1  
2 Antibody Correlates of Protection for COVID-19 Convalescent Plasma Associated with Reduced  
3 Outpatient Hospitalizations

4  
5 Han-Sol Park<sup>1\*</sup>, Caelan Barranta<sup>1\*</sup>, Anna Yin<sup>1\*</sup>, John S. Lee<sup>1</sup>, Christopher A. Caputo<sup>1</sup>, Maggie  
6 Li<sup>1</sup>, Steve Yoon<sup>1</sup>, Ioannis Sitaras<sup>1</sup>, Anne Jedlicka<sup>1</sup>, Yolanda Eby<sup>2</sup>, Malathi Ram<sup>3</sup>, Reinaldo E.  
7 Fernandez<sup>4</sup>, Owen R. Baker<sup>4</sup>, Aarthi G. Shenoy<sup>5</sup>, Giselle S. Mosnaim<sup>6</sup>, Yuriko Fukuta<sup>7</sup>, Bela  
8 Patel<sup>8</sup>, Sonya L. Heath<sup>9</sup>, Adam C. Levine<sup>10</sup>, Barry R. Meisenberg<sup>11</sup>, Emily S. Spivak<sup>12</sup>, Shweta  
9 Anjan<sup>13</sup>, Moises A. Huaman<sup>14</sup>, Janis E. Blair<sup>15</sup>, Judith S. Currier<sup>16</sup>, James H. Paxton<sup>17</sup>, Jonathan  
10 M. Gerber<sup>18</sup>, Joann R. Petrini<sup>19</sup>, Patrick B. Broderick<sup>20</sup>, William Rausch<sup>19</sup>, Marie Elena  
11 Cordisco<sup>19</sup>, Jean Hammel<sup>21</sup>, Benjamin Greenblatt<sup>21</sup>, Valerie C. Cluzet<sup>22</sup>, Daniel Cruser<sup>22</sup>, Kevin  
12 Oei<sup>23</sup>, Matthew Abinante<sup>23</sup>, Laura L. Hammitt<sup>24</sup>, Catherine G. Sutcliffe<sup>24</sup>, Donald N. Forthal<sup>25</sup>,  
13 Martin S. Zand<sup>26</sup>, Edward R. Cachay<sup>27</sup>, Jay S. Raval<sup>28</sup>, Seble G. Kassaye<sup>29</sup>, Christi E. Marshall<sup>2</sup>,  
14 Anusha Yarava<sup>3</sup>, Karen Lane<sup>3</sup>, Nichol A. McBee<sup>3</sup>, Amy L. Gawad<sup>3</sup>, Nicky Karlen<sup>3</sup>, Atika  
15 Singh<sup>3</sup>, Daniel E. Ford<sup>30</sup>, Douglas A. Jabs<sup>31</sup>, Lawrence J. Appel<sup>32</sup>, David M. Shade<sup>33</sup>, Bryan  
16 Lau<sup>33</sup>, Stephan Ehrhardt<sup>33</sup>, Sheriza N. Baksh<sup>33</sup>, Janna R. Shapiro<sup>1</sup>, Jiangda Ou<sup>3</sup>, Thomas J.  
17 Gniadek<sup>34</sup>, Patrizio Caturegli<sup>2</sup>, Jinke Wu<sup>35</sup>, Nelson Ndahiro<sup>35</sup>, Michael J. Betenbaugh<sup>35</sup>, Alyssa  
18 Ziman<sup>36</sup>, Daniel F. Hanley<sup>3</sup>, Arturo Casadevall<sup>1</sup>, Shmuel Shoham<sup>4</sup>, Evan M. Bloch<sup>2</sup>, Kelly A.  
19 Gebo<sup>4</sup>, Aaron A.R. Tobian<sup>2</sup>, Oliver Laeyendecker<sup>37</sup>, Andrew Pekosz<sup>1</sup>, Sabra L. Klein<sup>1\*</sup> and  
20 David J. Sullivan<sup>1\*</sup>

21  
22 <sup>1</sup>W. Harry Feinstone Department of Molecular Microbiology and Immunology; Johns Hopkins  
23 Bloomberg School of Public Health, Baltimore, MD, USA

24 <sup>2</sup>Department of Pathology, Johns Hopkins University School of Medicine, Baltimore, MD, USA

25 <sup>3</sup>Department of Neurology, Brain Injury Outcomes, Johns Hopkins University School of  
26 Medicine, Baltimore, MD, USA

27 <sup>4</sup>Department of Medicine, Division of Infectious Diseases, Johns Hopkins University School of  
28 Medicine, Baltimore, MD, USA

29 <sup>5</sup>Department of Medicine, Division of Hematology and Oncology, MedStar Washington Hospital  
30 Center, Washington DC, USA

31 <sup>6</sup>Division of Allergy and Immunology, Department of Medicine, NorthShore University Health  
32 System, Evanston, IL, USA

33 <sup>7</sup>Department of Medicine, Section of Infectious Diseases, Baylor College of Medicine, Houston,  
34 TX, USA

35 <sup>8</sup>Department of Medicine, Division of Pulmonary and Critical Care Medicine, University of  
36 Texas Health Science Center, Houston, TX, USA

37 <sup>9</sup>Department of Medicine, Division of Infectious Diseases, University of Alabama at  
38 Birmingham, Birmingham, AL, USA

39 <sup>10</sup>Department of Emergency Medicine, Rhode Island Hospital, Brown University, Providence,  
40 RI, USA

41 <sup>11</sup>Luminis Health, Annapolis, MD, USA

42 <sup>12</sup>Department of Medicine, Division of Infectious Diseases, University of Utah School of  
43 Medicine, Salt Lake City, UT, USA

44 <sup>13</sup>Department of Medicine, Division of Infectious Diseases, University of Miami Miller School  
45 of Medicine, Miami, FL, USA

46 <sup>14</sup>Department of Medicine, Division of Infectious Diseases, University of Cincinnati, Cincinnati,  
47 OH, USA

48 <sup>15</sup>Department of Medicine, Division of Infectious Diseases, Mayo Clinic Hospital, Phoenix, AZ,  
49 USA

50 <sup>16</sup>Department of Medicine, Division of Infectious Diseases, University of California, Los  
51 Angeles, CA, USA

52 <sup>17</sup>Department of Emergency Medicine, Wayne State University, Detroit, MI, USA

53 <sup>18</sup>Department of Medicine, Division of Hematology and Oncology, University of Massachusetts  
54 Chan Medical School, Worcester, MA, USA

55 <sup>19</sup>Nuvance Health, Danbury, CT, USA

56 <sup>20</sup>Nuvance Health Danbury Hospital, Danbury, CT, USA

57 <sup>21</sup>Nuvance Health Norwalk Hospital, Norwalk, CT, USA

58 <sup>22</sup>Nuvance Health Vassar Brothers Medical Center, Poughkeepsie, NY, USA

59 <sup>23</sup>Ascada Research, Fullerton, CA, USA

60 <sup>24</sup>Department of International Health, Johns Hopkins Bloomberg School of Public Health,  
61 Baltimore, MD, USA

62 <sup>25</sup>Department of Medicine, Division of Infectious Diseases, University of California, Irvine, CA,  
63 USA

64 <sup>26</sup>Department of Medicine, University of Rochester Medical Center, Rochester NY, USA

65 <sup>27</sup>Department of Medicine, Division of Infectious Diseases, University of California, San Diego,  
66 CA, USA

67 <sup>28</sup>Department of Pathology, University of New Mexico School of Medicine, Albuquerque, NM,  
68 USA

69 <sup>29</sup>Department of Medicine, Division of Infectious Diseases, Georgetown University Medical  
70 Center Washington DC, USA

71 <sup>30</sup>Institute for Clinical and Translational Research Johns Hopkins University School of Medicine,  
72 Baltimore, MD, USA

73 <sup>31</sup>Department of Ophthalmology Johns Hopkins University School of Medicine, Baltimore, MD,  
74 USA

75 <sup>32</sup>Welch Center for Prevention, Epidemiology and Clinical Research, Johns Hopkins University  
76 School of Medicine, Baltimore, MD, USA

77 <sup>33</sup>Department of Epidemiology, Johns Hopkins Bloomberg School of Public Health, Baltimore,  
78 MD, USA

79 <sup>34</sup>Department of Pathology and Laboratory Medicine, Northshore University Health System,  
80 Evanston, IL

81 <sup>35</sup>Advanced Mammalian Biomanufacturing Innovation Center, Department of Chemical and  
82 Biomolecular Engineering, Johns Hopkins University, Baltimore, MD, USA

83 <sup>36</sup>Department of Pathology and Laboratory Medicine, Wing-Kwai and Alice Lee-Tsing Chung  
84 Transfusion Service, David Geffen School of Medicine, University of California, Los Angeles,  
85 CA, USA

86 <sup>37</sup>Division of Intramural Research, National Institute of Allergy and Infectious Diseases,  
87 Baltimore, MD, USA

88

89 These authors contributed equally: Han-Sol Park, Caelan Barranta, Anna Yin

90 These authors jointly supervised this work: Sabra Klein, David Sullivan

91 Abstract word count 149

92 Main text: 3907  
93 1 table and 5 figures and Extended tables 3 and 6 Extended figures  
94 **Abbreviations:** CCP: COVID-19 convalescent plasma; RCT: randomized controlled trial.  
95 **Keywords:** convalescent plasma; hospitalization; COVID-19; outpatients; randomized  
96 controlled trial; virus load.  
97 David Sullivan can be contacted at [dsulliv7@jhmi.edu](mailto:dsulliv7@jhmi.edu) or Sabra Klein at [sklein2@jhu.edu](mailto:sklein2@jhu.edu); Johns  
98 Hopkins Bloomberg School of Public Health, Department of Molecular Microbiology and  
99 Immunology, 615 N. Wolfe St., Baltimore, MD 21205.

## 100 **Table of Contents**

|     |                                                                                                             |           |
|-----|-------------------------------------------------------------------------------------------------------------|-----------|
| 101 | <b><i>ABSTRACT</i></b> .....                                                                                | <b>5</b>  |
| 102 | <b><i>INTRODUCTION</i></b> .....                                                                            | <b>5</b>  |
| 103 | <b><i>RESULTS</i></b> .....                                                                                 | <b>6</b>  |
| 104 | <b>Trial population</b> .....                                                                               | <b>6</b>  |
| 105 | <b>Donor CCP and recipient screen and post-transfusion antibody levels in unvaccinated</b>                  |           |
| 106 | <b>participants</b> .....                                                                                   | <b>6</b>  |
| 107 | <b>Recipient antibody level post-transfusion benchmarks of protection that prevents hospitalization</b>     |           |
| 108 | .....                                                                                                       | <b>7</b>  |
| 109 | <b>Donor antibody level pre-transfusion benchmarks of protection that prevent hospitalization</b> .....     | <b>7</b>  |
| 110 | <b>Screen seropositive hospitalizations in the unvaccinated</b> .....                                       | <b>8</b>  |
| 111 | <b>Pre-transfusion nasal SARS-CoV-2 viral RNA loads</b> .....                                               | <b>8</b>  |
| 112 | <b>Differences in antibody levels weeks after transfusion</b> .....                                         | <b>9</b>  |
| 113 | <b>Variant period differences in screen seropositivity, nasal viral load and day 90 antibody levels</b> ... | <b>9</b>  |
| 114 | <b><i>Discussion</i></b> .....                                                                              | <b>10</b> |
| 115 | <b><i>Online Methods</i></b> .....                                                                          | <b>12</b> |
| 116 | <b><i>Data Availability</i></b> .....                                                                       | <b>16</b> |
| 117 | <b><i>Code Availability</i></b> .....                                                                       | <b>16</b> |
| 118 | <b><i>References</i></b> .....                                                                              | <b>16</b> |
| 119 | <b><i>Acknowledgements</i></b> .....                                                                        | <b>19</b> |
| 120 | <b><i>Author Contributions</i></b> .....                                                                    | <b>19</b> |
| 121 | <b><i>Competing Interests</i></b> .....                                                                     | <b>19</b> |
| 122 | <b><i>Tables</i></b> .....                                                                                  | <b>20</b> |
| 123 | <b><i>Figures</i></b> .....                                                                                 | <b>25</b> |
| 124 | <b><i>Extended Figures</i></b> .....                                                                        | <b>30</b> |
| 125 |                                                                                                             |           |
| 126 |                                                                                                             |           |

## 127 ABSTRACT

128 SARS-CoV-2 antibody levels associated with reduced hospitalization risk remain undefined. Our  
129 outpatient COVID-19 convalescent plasma (CCP), placebo-controlled trial observed SARS-  
130 CoV-2 antibody levels decreasing 22-fold from matched donor units into post-transfusion  
131 seronegative recipients. Unvaccinated recipients were jointly stratified by a) early or late  
132 transfusion ( $\leq 5$  or  $>5$  days from symptom onset) and b) high or low post-transfusion SARS-  
133 CoV-2 antibody levels ( $<$  or  $\geq$  geometric mean). Early treatment with high post-transfusion  
134 antibody levels reduced hospitalization risk-0/102 (0%) compared to all other CCP recipients-  
135 17/370 (4.6%; Fisher exact  $p=0.03$ ) and to all control plasma recipients-35/461 (7.6%; Fisher  
136 exact  $p=0.001$ ). A similar donor upper/lower antibody level and early late transfusion stratified  
137 analyses indicated significant hospital risk reduction. Pre-transfusion nasal viral loads were  
138 similar in CCP and control recipients regardless of hospitalization outcome. Therapeutic CCP  
139 should comprise the upper 30% of donor antibody levels to provide effective outpatient use for  
140 immunocompromised and immunocompetent outpatients.

## 141 INTRODUCTION

142 The threshold of antibody correlating with reduced severe disease progression varies and needs  
143 to be independently determined for diverse infectious diseases, from protozoans, like  
144 *Plasmodium falciparum*<sup>1,2</sup> to viruses, like SARS-CoV-2<sup>3,4</sup>. Correlates of protection for antibody  
145 levels demarcating vaccine efficacy for COVID-19 hospitalization risk reduction have been  
146 represented in relation to COVID-19 convalescent plasma (CCP) equivalents<sup>5-7</sup>. Likewise, a  
147 model<sup>8</sup> utilizing vaccine, monoclonal antibody, and CCP data from clinical trials was created  
148 based on the reference CCP equivalents for 50% hospitalization risk reduction<sup>9-11</sup>. Monoclonal  
149 antibody outpatient randomized controlled trials (RCTs) demonstrate 50%-80% efficacy in  
150 hospital risk reduction<sup>12-15</sup>. However, the same monoclonal antibody doses failed to show disease  
151 progression reduction in COVID-19 inpatients<sup>14,16-18</sup>. Like the monoclonal antibodies,  
152 intravenous remdesivir demonstrated greater efficacy in outpatients versus inpatients<sup>19,20</sup>. In  
153 summary, both early timing and dose of antiviral antibodies and drugs matter for outpatient  
154 reduction of hospitalization risk.

155  
156 Convalescent persons recovering from pre-Alpha period COVID-19 have varying antibody  
157 levels spanning a 3-log<sub>10</sub> range from undetectable antibody to positive after a 3 to 5 thousand  
158 dilution<sup>21</sup>. Individuals with both boosted vaccines and recent COVID-19 (i.e., hybrid immunity)  
159 have considerably higher antibody levels (i.e., detectable even over 50,000 inverse dilutional  
160 geometric mean titers) than either individuals with antibodies from infection or vaccination alone  
161 <sup>22,23</sup>. Our CCP outpatient treatment within 9 days of symptom onset, showed greater than 50%  
162 hospitalization relative risk reduction, which increased to more than 80% risk reduction (point  
163 estimate) when given within 5 days of symptom onset<sup>24</sup>. Hospitalized participants had the same  
164 donor unit range of SARS-CoV-2 antibody levels as those not hospitalized.

165  
166 A prespecified analysis from the parent outpatient CCP RCT aimed to compare antibody levels  
167 in donor-recipient pairs to define dilutional decrease and to correlate both donor and recipient  
168 antibody levels to disease progression culminating in hospitalization. In this substudy, we  
169 analyzed the risk of hospitalization among unvaccinated COVID-19 outpatients, comparing  
170 control plasma recipients to four different CCP groups jointly stratified by early or late treatment

171 (i.e.,  $\leq 5$  or  $>5$  days from symptom onset), and by high or low post-transfusion recipient or donor  
172 antibody levels (i.e.,  $<$  or  $\geq$  geometric mean, GM).

## 173 RESULTS

### 174 Trial population

175 At 23 sites throughout the USA, the previously reported outpatient CCP clinical trial (CSSC-004,  
176 NCT04373460) transfused 1181 COVID-19 outpatients over 16 months (June 3, 2020 to October  
177 1, 2021), to show that receipt of CCP, compared to control plasma, reduced the risk of  
178 hospitalization for COVID-19 by 54%<sup>24</sup>. Written and signed informed consent was obtained  
179 from all participants. Hospitalizations occurred in 53 of 964 unvaccinated and 1 of 58 partially  
180 vaccinated participants. None of the 159 fully vaccinated individuals were hospitalized<sup>24</sup>. We  
181 focused our correlation of antibody level analysis and hospitalization on those unvaccinated with  
182 evaluable antibody data, for which 479 received control plasma and 472 CCP (Table 1). The  
183 unvaccinated participant's mean age was 44, with more females than males, approximately 40%  
184 obese with BMI 30 or over, and approximately 40% with one or more pre-existing comorbidities  
185 for severe COVID-19 risk. Unvaccinated CCP recipients, both screen seropositive or  
186 seronegative were further jointly stratified by early ( $\leq 5$  days of symptom onset) or late ( $>5$  days  
187 of symptoms onset) time to transfusion as well as post-transfusion antibody levels (measured  
188 within 30 minutes after transfusion completion) in the upper or lower half of screened  
189 seronegative CCP recipients (Table 1).

190

### 191 Donor CCP and recipient screen and post-transfusion antibody levels in unvaccinated 192 participants

193 Approximately 40% of all potential CCP study donors were excluded for low antibody levels,  
194 thus transfusion units represented the upper 60% of all convalescent plasma donors. Because of  
195 the greater correlation with virus neutralization antibody (nAb), we measured the plasma anti-  
196 Spike-Receptor Binding Domain (S-RBD) IgG antibodies levels by dilutional titer and the more  
197 precise area under the curve (AUC) on both the donors at collection and in over 5,000 recipient  
198 samples at pre-transfusion screen, post-transfusion and follow-up visits<sup>21</sup>. The anti-S-RBD IgG  
199 titer threshold for seronegative was 180 titer or below. The donor anti-S-RBD IgG GM titer of  
200 6,678 and anti-S-RBD IgG AUC of 3,172 separated donor antibody levels' upper and lower half  
201 (Fig. 1A). The donor control plasma was either collected in 2019 (211 units) or blood bank tested  
202 SARS-CoV-2 seronegative when collected in 2020-2021.

203

204 To experimentally determine the dilution factor associated with the single  $\sim 200$  mL CCP  
205 administration in 338 unvaccinated seronegative recipients, measurements of matched donor and  
206 recipient anti-S-RBD IgG AUC were performed. The matched transfusion donor antibody levels  
207 proportionately decreased 22-fold (approximately 5%) from the GM donor anti-S-RBD IgG  
208 3286 AUC to recipient post-transfusion antibody levels at GM 147 AUC measured within 30  
209 minutes of transfusion completion (Fig. 1B). The decrease was parallel such that matched donor  
210 antibody levels below 1000 AUC were also consistently below 150 AUC post-transfusion in  
211 recipients. Similarly, 15 seronegative hospitalized CCP recipients had post-transfusion antibody  
212 levels 19 times lower than their matched donors (Fig. 1C).

213

214 The unvaccinated study participants included a screen seropositive participant subset (199/951  
215 (21%) (107 in the CCP and 92 in the control plasma groups), with 83% of the 199 seropositive



216 participants already having pre-transfusion antibody levels above the GM 150 AUC for  
217 seronegative post-transfusion CCP recipients (Fig. 1D). The pre-transfusion seropositive  
218 transfusion antibody levels were near 500 to 1000 GM anti-S-RBD IgG AUC which is 3 to 6  
219 times lower than the donor anti-S-RBD IgG antibody levels of 3172 AUC. The low post-  
220 transfusion recipient antibodies (early or late) were predictably lower in frequency and GM AUC  
221 levels. Segregating the unvaccinated seropositive recipients by days from symptom onset to  
222 transfusion revealed a trend of a higher frequency of participants being seropositive after day 3,  
223 with higher GM antibody levels approximating 1000 anti-S-RBD IgG AUC, which was  
224 associated with the early development of virus-specific immunity also observed by Wolfel<sup>25</sup>  
225 (Fig. 1E).

226

### 227 Recipient antibody level post-transfusion benchmarks of protection that prevents 228 hospitalization

229 To correlate post-transfusion antibody levels among unvaccinated participants (both screen  
230 seronegative and seropositive) to hospital outcome, we stratified the post-transfusion anti-S-RBD  
231 IgG AUC by early or late treatment and high or low antibody levels for the CCP group (Fig. 2,  
232 Extended Table 1). The recipient antibody geometric mean of 150 AUC delineated high versus  
233 low antibody levels. Among the CCP participants treated early (symptom onset within 5 days)  
234 with high post-transfusion recipient antibody levels, there were no hospitalizations, 0/102  
235 participants. In those unvaccinated CCP recipients treated early with low post-transfusion  
236 antibody levels (anti-S-RBD IgG AUC below 150 AUC), we observed 5/104 (5%) participant  
237 hospitalizations (Fig. 2). There were 12 total hospitalizations in the two groups receiving  
238 transfusions late—6/164 (3.7%) recipients with high antibody levels and 6/102 (6%) recipients  
239 with antibodies below anti-S-RBD IgG 150 AUC. We compared the proportion of  
240 hospitalizations of the early treatment with high post-transfusion antibody level CCP group with  
241 that of the other three CCP groups (17/270, 4.6%; Fishers exact p=0.03), the control plasma  
242 group (36/479, 7.5%; Fishers exact p=0.001), and the early control plasma group (24/207,  
243 11.6%; Fishers exact p=0.00005; Extended Table 1). Similarly, delineating high and low post-  
244 transfusion recipient antibody levels above the geometric mean of 540 anti-S-RBD IgG titer,  
245 although less precise than AUC, revealed that participants receiving early treatment with high  
246 titer CCP also had no hospitalizations (0/45, 0%; Extended Fig. 1 and Table 1).

247

### 248 Donor antibody level pre-transfusion benchmarks of protection that prevent 249 hospitalization

250 To correlate matched CCP donor units in the unvaccinated recipients to hospital outcome, we  
251 next investigated if the corresponding donor antibody levels would also translate into protection  
252 from hospitalization. The unvaccinated CCP recipients were again delineated by symptom onset  
253 to transfusion, but instead of post-transfusion antibody level representation, the matched  
254 corresponding donor antibody levels were stratified by donor anti-S-RBD IgG antibodies at GM  
255 3286 AUC for all 592 recipients (Fig. 3A) and virus neutralization antibody (nAb) levels  $\geq 60$   
256 AUC (Fig. 3B). In all antibody level metrics, we compared the GM upper to lower as high and  
257 low antibody levels, respectively. The numbers remained statistically significant by the Fishers  
258 exact test compared to both control plasma groups (Fig. 3 and Extended Table 1). Similar to the  
259 analyses with AUC values, donor anti-S-RBD IgG and nAb GM titer values, although less  
260 precise, revealed their respective recipients with early treatment and high donor antibody titers  
261 having the lowest proportion of hospitalizations (Extended Fig. 2 and Table 2). We also stratified

262 donor antibody levels by the commercial assay EUROIMMUN ratio of optical density expressed  
263 above or below 6 AU or 600 BAU/mL (Extended Fig 3 and Extended Table 1), a level that also  
264 demarcates the upper portion of study donors<sup>24</sup>.

265

### 266 Screen seropositive hospitalizations in the unvaccinated

267 The screen seropositive recipients with subsequent hospitalizations were investigated, despite  
268 low incidence. 7/54 unvaccinated participants, subsequently hospitalized, were seropositive at  
269 the initial screen, two in the CCP group and five in the control group (Extended Table 2). Three  
270 of the five hospitalized participants from the control group had screen anti-S-RBD IgG antibody  
271 titers at 540 and AUC less than 150, fitting the early/low seronegative data described above. In  
272 the unvaccinated CCP group, 2/107 (1.9%) who were screen seropositive were hospitalized  
273 versus 15/378 (4%) seronegative at screen (Chi square  $p=0.29$ ; CCP seropositive versus  
274 seronegative). Among the control group of whom were hospitalized, there were 5/92 (5.4%)  
275 screen seropositive versus 29/381 (7.6%) screen seronegative (chi square  $p=0.47$  control-  
276 seropositive to seronegative). Of those screened seropositive, there was no statistical difference  
277 in hospitalization between those who received CCP and control plasma (chi square  $p=0.17$ ; CCP-  
278 seropositive to control-seropositive). The single screen seronegative and partially vaccinated  
279 hospitalized participant transfused with control plasma received their first vaccine dose the same  
280 day as symptom onset. Among the 159 fully vaccinated and not hospitalized, 158 (99%) were  
281 screen seropositive, while 30/58 (69%) partially vaccinated participants were seropositive.

282

### 283 Pre-transfusion nasal SARS-CoV-2 viral RNA loads

284 Nasal viral load might independently determine risk of hospitalization. Quantitative RT-PCR  
285 was performed on the screen nasal swabs collected before plasma transfusion to correlate the  
286 SARS-CoV-2 nasal viral RNA load to hospitalization. All unvaccinated individuals subsequently  
287 receiving either control plasma or CCP had indistinguishable screen viral loads (i.e., near 10,000  
288 copies) (Fig. 4A). Analyzing nasal viral loads of early/high, early/low, late/high, and late/low  
289 recipient groups revealed, as expected, that early transfusions closer to symptom onset were  
290 associated with higher viral loads than late transfusions. The CCP early/high and early/low  
291 recipient pre-transfusion nasal viral loads were indistinguishable. The viral load was similar  
292 among unvaccinated at screen, regardless of subsequent hospitalization outcome (Fig. 4B).  
293 While the inclusion criteria required a documented positive molecular SARS-CoV-2 test (87%  
294 by RNA detection and 13% by antigen detection), the interval between the study inclusion  
295 SARS-CoV-2 test (performed outside the study) and the research study nasal swab collection  
296 prior to transfusion may have been up to a week.

297

298 Stratifying nasal viral load by days from symptom onset to transfusion time among unvaccinated  
299 participants infected prior to the Delta variant, which has different viral load kinetics<sup>26,27</sup>,  
300 indicated a decline in pre-transfusion viral burden among seronegative individuals after 5 days  
301 from symptom onset (Fig. 4C). Seropositive individuals had lower viral loads compared to  
302 seronegative individuals at all timepoints, with a majority of seropositive viral loads below the  
303 limit of detection (330 copies) by day 4 post-symptom onset (Fig. 4D). The screen viral RNA  
304 copy data suggest that seropositivity at the time of transfusion correlated with lower viral loads,  
305 but differences in viral RNA load did not impact hospitalization outcome.

306



### 307 Differences in antibody levels weeks after transfusion

308 Passive transfer of SARS-CoV-2 specific antibodies was postulated to possibly down-modulate  
309 subsequent SARS-CoV-2 antibody responses. This clinical study was designed to measure  
310 antibody responses up to 90 days post-transfusion to compare antibody kinetics between CCP  
311 and control plasma recipients. There were no differences in antibody levels between CCP and  
312 control plasma recipients at or beyond 14 days post-transfusion (Fig. 5). Longitudinal differences  
313 in antibody levels observed were due to hospitalization rather than treatment. The multivariate  
314 linear mixed-effects regression, adjusted for variant, age, sex, and BMI, showed no differences in  
315 antibody levels between CCP and control plasma recipients beyond 14 days post-transfusion  
316 (Fig. 5). There were neither sex, age, BMI, nor comorbidity differences in antibody levels  
317 between CCP and control groups.

318  
319 Within the control group, there were eight immunocompetent recipients with undetectable  
320 SARS-CoV-2 antibody levels during all follow-up visits. Three of the 8 had persistent COVID-  
321 19 symptoms after 90 days of study follow-up. All CCP recipients had detectable antibodies at or  
322 after the day 14 visit.

### 323 324 Variant period differences in screen seropositivity, nasal viral load and day 90 antibody levels

325 We investigated how SARS-CoV-2 variants influenced seropositivity, nasal viral load and 3-  
326 month antibody levels in the setting of ongoing vaccination after December 2020. We separated  
327 participants into three periods: pre-Alpha (June 3, 2020 to January 31, 2021), Alpha (February 1,  
328 2021 to July 15 2021), and Delta (July 16, 2021 to October 1, 2021). Participants recruited in the  
329 Delta period were younger, with fewer medical conditions, and more than 60% fully vaccinated  
330 (Extended Table 3). Screen seropositivity rates among unvaccinated individuals were low (~  
331 20%), during pre-Alpha and Alpha periods rising to 46% during the Delta period. The baseline  
332 screen anti-S-RBD AUC GM antibody levels in the unvaccinated seropositive participants were  
333 529, 482, and 7042 anti-S-RBD AUC during the pre-Alpha, Alpha and Delta periods,  
334 respectively compared to the 3286 AUC in the mainly pre-Alpha study donors (Extended Fig.  
335 4A).

336  
337 Pre-transfusion nasal viral loads were similar between CCP and control during the pre-Alpha,  
338 Alpha, and Delta periods (Extended Fig. 4B). When unvaccinated participants were stratified  
339 based on seropositivity at the time of transfusion, viral loads were consistently lower in  
340 seropositive individuals compared to seronegative individuals regardless of the time period in  
341 which CCP was administered (Extended Fig. 4C). During the Delta period, unvaccinated  
342 seropositive individuals also had lower viral loads compared to seronegative individuals, but the  
343 participant numbers stratified by symptom onset day were low (Extended Fig. 5A, B). Fully  
344 vaccinated and seropositive participants at screen also showed a drop in viral load when  
345 transfusion occurred more than 5 days after symptom onset (Extended Fig. 5C).

346  
347 Comparing CCP and control day 90 antibody levels in those unvaccinated at screen (excluding  
348 the 165 vaccinated during the follow-up visits), indicated no difference between treatment  
349 groups or groups stratified by early or high CCP antibody treatment (Extended Figure 6A).  
350 Those unvaccinated participants, subsequently hospitalized (41/54, 76%) during the pre-Alpha  
351 period, had a GM of 13007 AUC with very few having antibody levels below the mean for  
352 unvaccinated participants in the pre-Alpha period at day 90 compared to the non-hospitalized

353 unvaccinated pre-Alpha participants GM 2691 AUC antibody level, 5 times less than those  
354 hospitalized (Extended Fig. 6B). Unvaccinated recipients during the Alpha period had similar  
355 day 90 antibody levels (geometric mean AUC=6683) to those infected during the Delta period  
356 (geometric mean AUC=5929), but near double the pre-Alpha period participants. Fully  
357 vaccinated recipients at screen who had breakthrough infection during Delta period showed a  
358 GM AUC of 53813, which was 20 times greater than the GM AUC of day 90 pre-Alpha period  
359 recipients.

## 360 Discussion

361 This jointly stratified study analysis by both time to transfusion and antibody levels found that  
362 post-transfusion anti-S-RBD IgG AUC levels at or over 150 AUC and transfusion within 5 days  
363 of symptom onset, resulted in no hospitalization in unvaccinated recipients. In seronegative  
364 recipients, the post-transfusion upper 50% antibody levels were proportionately matched to  
365 upper 50% donor antibody levels measurements by three different test methodologies-anti-S-  
366 RBD IgG ELISA, direct live virus neutralization, and EUROIMMUN anti-SARS-CoV-2 ELISA.  
367 Given that we selected the upper 60% of donors for study qualification and by all antibody  
368 measurements for stratified analysis, the upper half of qualified donors which equals the upper  
369 30%, had similar impact on hospitalization risk reduction. The four-quadrant graphic depiction  
370 of hospitalizations was similar in the recipient antibody levels compared to the 3 separate donor  
371 antibody level measurements. This implicates the upper 30% of all potential pre-Alpha CCP  
372 donors as effective for reducing hospitalizations prior to the Delta variant.

373  
374 An individual's circulating plasma volume is, on average, 3 liters, which predicts a 15-fold  
375 proportional antibody dilution for a 200 mL CCP transfusion. A prior infection prevention study  
376 transfused CCP into healthy nonSARS-CoV-2 infected individuals and similarly measured 20-  
377 fold SARS-CoV-2 antibody dilution<sup>28</sup>. This suggests that the antibody compartment volume is  
378 similar between non-infected individuals and those with COVID-19 during the first week of  
379 illness. We did not observe a measurably higher volume of distribution, suggesting that  
380 extravascular transfer of high levels of antibodies to lower the post-transfusion antibody levels  
381 occurred. The donor and recipient antibody levels are directly proportional in Fig. 1B-C where  
382 the lines are parallel with the 22-fold dilution. From the recipient post-transfusion levels, one can  
383 predict matched donor levels are proportionately greater by a factor of 20. The screen  
384 seronegative participants had a clean negative antibody background. Those who were screen  
385 seropositive in Fig. 1D already had greater antibody levels than more than half of the post-  
386 transfusion seronegative participants. We have not explored whether CCP has better neutralizing  
387 abilities than the early host immune response when antibodies are just starting to measurably  
388 increase after 4 days from symptom onset for screen seropositive participants (low antibodies in  
389 the 500 to 1000 range) (Fig. 1E).

390  
391 Antivirals (antibodies or small molecule antivirals) administered early in the COVID-19 course  
392 protect from progression to severe disease requiring hospitalization. At least three factors interact  
393 to predict risk of outpatient hospitalization: 1) viral load and variant properties; 2) human host  
394 risk factors for severe disease (age, obesity, or medical comorbidities), and 3) quantity and  
395 quality (degree of match to variants) of SARS-CoV-2 specific antibodies at disease onset, due to  
396 active vaccination or immune status (i.e., hybrid immunity, breakthrough, etc.).

397

398 We found no differences in nasal viral loads between control and CCP recipients at screening to  
399 account for differences in hospitalization rates. Importantly, those participants who were  
400 subsequently hospitalized had similar viral loads at the time of transfusion when compared to  
401 those not hospitalized. Unvaccinated recipients who were seropositive at screening had lower  
402 viral loads than seronegative participants. We also observed lower viral loads in those screened  
403 late. Specifically, those who were screened and transfused late ( $\geq 5$  days after symptom onset)  
404 had lower viral loads compared to those who were transfused early, suggesting that the  
405 administration of antiviral drugs or CCP early (i.e., during the period of higher viral loads  
406 measured by nasal sampling) maximizes the therapeutic effect. Viral load dynamics in the lung  
407 or other tissues may differ, and treatment timing should be explored further.

408  
409 The jointly stratified subgroup analysis was matched for patients' age, demographics, obesity  
410 and one or more medical conditions for severe COVID-19 progression to hospitalization. Our  
411 study population was also younger, less obese and with fewer risk factors for disease progression  
412 than other published RCTs of CCP outpatient use<sup>29</sup>. Our study population also had a higher  
413 prevalence of seronegative participants upon transfusion than the Emergency Department based  
414 study (C3PO) where the seropositive rate was near 50%, which may be indicative of a different  
415 patient population<sup>30</sup>.

416  
417 In this study, there are COVID-19 participants with a 100-fold range of antibody levels. CCP  
418 units from the top 30% of all convalescent donors are necessary to confer protection against  
419 hospitalization with severe COVID-19, such that when antibody levels are diluted approximately  
420 20-fold, the recipient antibody levels remain above the CCP GM. These data suggest that  
421 convalescent plasma has been underdosed in prior infectious disease outbreaks and that future  
422 pandemic patients should receive higher therapeutic donor antibody levels. The current study  
423 introduces the concept that therapeutic donor CCP levels must be in the upper half or higher to  
424 fully account for the dilution effect in the recipient. Plasma from approximately 330 unique CCP  
425 donations were transfused into 592 CCP participants. These donor units were previously  
426 characterized for full-length anti-Spike IgG with GM titers of 13,053 and more precise AUC GM  
427 of 7938 which equals 243 BAU/mL using the international standards<sup>31</sup>. The median nAb titer  
428 was 80 with GM titer of 58 and nAb AUC of 51, equaling GM 27 IU/mL. The commercial  
429 EUROIMMUN arbitrary units (AU) mean was 6 for the unique units. The donor anti-S-RBD  
430 IgG GM titer was 6,678 and anti-S-RBD IgG GM AUC of 3,172. These thresholds separate the  
431 upper and lower portion of donor antibody levels and was also approximately 50% of total full  
432 length Spike titer antibody levels, but 100 times the nAb GM titer levels.

433  
434 Unvaccinated participants who received CCP after 5 days (late) or received units with low  
435 antibody levels still had near significant reduction in hospital risk of about 4% rather than 7.6%  
436 in all controls. The parent study included fully vaccinated and partially vaccinated participants in  
437 the analyses, which lowered risk of hospitalization to 6.3%. Here, we observed an 11.6% risk of  
438 hospitalization among unvaccinated controls transfused early within 5 days of symptom onset.  
439 The effect of early CCP transfusion and high post-transfusion antibody is even greater among  
440 this subgroup of unvaccinated recipients.

441  
442 The antibody level that affords protection is not absolute, as not even monoclonal antibody or  
443 small molecule antiviral therapy affords 100% reduction in risk of hospitalization. There were

444 two screen seropositive participants in the CCP group and two in the control group with antibody  
445 levels also above the anti-S-RBD IgG antibody threshold of inverse dilution titer over 540 and  
446 AUC over 150, presumptively with newly formed antibodies. The finding that early  
447 administration of antibodies to SARS-CoV-2 is beneficial in reducing progression of disease is  
448 consistent with the observation that those who mount early antibody responses have lower rates  
449 of death after hospitalization<sup>32,33</sup> and that inducement of humoral immunity by vaccination  
450 reduces severity of disease and death<sup>34</sup>.

451  
452 When CCP was first deployed in 2020, there were concerns that specific antibody administration  
453 to individuals in the early stages of COVID-19 could interfere with the development of  
454 endogenous immune responses<sup>35</sup>. However, our findings show that transfusion of CCP, as  
455 compared to control plasma, was not associated with differences in the development of a  
456 humoral immune response in recipients, reassuring for the immunological safety of CCP in  
457 humans. The C3PO convalescent plasma study also did not see an antibody level difference  
458 between CCP and saline infusions<sup>30,36</sup>.

459  
460 While our study had predominately SARS-CoV-2 naïve recipients enrolled prior to the Omicron  
461 variant who were largely unvaccinated, the findings are applicable to immunocompromised  
462 patients today who lack SARS-CoV-2 antibodies. Another limitation is the low number of  
463 seronegative participants transfused within 5 days of symptom onset with post-transfusion above  
464 the geometric mean donor antibody levels in our study population (approximately 100  
465 participants). The parent study was not powered to look at these stratified quadrants.

466  
467 In summary, our results support and reconfirm the adage that for antibody therapy to be  
468 effective, sufficient amounts of pathogen specific antibody should be dosed early<sup>37</sup>. No  
469 hospitalizations were observed in those treated at  $\leq 5$  days of symptom onset with high titer CCP  
470 indicating that this is the optimal combination for effective CCP use. Early treatment alone is  
471 insufficient as hospitalizations were still observed in the group treated  $\leq 5$  days with lower titer  
472 units, necessitating both early treatment and adequate antibody dosing for optimal efficacy. Our  
473 results provide evidence for the best use of CCP. We advocate that CCP units used for therapy  
474 comprise the upper 30% of donor antibody levels. These levels should set the threshold for future  
475 therapeutic CCP. When humanity faces its next pandemic, there is a high likelihood that  
476 convalescent plasma will be used again until better specific therapies become available. Our data  
477 provide a roadmap for optimal early, high dose convalescent plasma deployment in such future  
478 emergencies.

479

## 480 Online Methods

### 481 Study Ethics

482 Johns Hopkins served as the single-IRB (sIRB). For the Center for American Indian Health sites,  
483 the protocol was also independently reviewed and approved by the Navajo Nation Health Human  
484 Research Review Board and the National Indian Health Service IRB. The protocol was also  
485 approved by the Department of Defense (DoD) Human Research Protection Office (HRPO).  
486 An independent medical monitor who was unaware of the trial group assignments reviewed all  
487 serious adverse events, and an independent panel of three physicians who were unaware of the  
488 trial-group assignments adjudicated Covid 19 related hospitalizations and severity. An



489 independent data and safety monitoring board provided interim safety and efficacy reviews. The  
490 trial was conducted in accordance with the principles of the Declaration of Helsinki, the Good  
491 Clinical Practice guidelines of the International Council for Harmonisation, and all applicable  
492 regulatory requirements.

#### 493 494 Study Population

495 In this multicenter, double-blind, randomized, controlled trial, we evaluated the efficacy and  
496 safety of COVID-19 convalescent plasma, as compared with control plasma, in symptomatic  
497 adults ( $\geq 18$  years of age) who had tested positive for severe acute respiratory syndrome  
498 coronavirus 2, regardless of their risk factors for disease progression or vaccination status.  
499 Participants were enrolled within 8 days after symptom onset and received a transfusion within 1  
500 day after randomization. The primary study outcome (reported previously) was COVID-19–  
501 related hospitalization within 28 days after transfusion. There were no obvious imbalances  
502 between the trial groups in the parent trial with respect to baseline characteristics, including  
503 coexisting conditions, COVID-19 vaccination status, vital signs, and clinical laboratory results.

#### 504 505 Study Center(s):

506 Anne Arundel Medical Center; Ascada Research; Baylor College of Medicine; Johns Hopkins  
507 Center for American Indian Health; Johns Hopkins Bloomberg School of Public Health; Johns  
508 Hopkins University; Lifespan/Brown University Rhode Island Hospital; Mayo Clinic, Phoenix;  
509 MedStar Washington Hospital Center; NorthShore University Health System; The Bliss Group;  
510 The Next Practice Group; University of California, Los Angeles Health; University of Alabama  
511 at Birmingham; University of California, Irvine Health; University of California, San Diego;  
512 University of Cincinnati Medical Center; University of Massachusetts Worcester; University of  
513 Miami; University of New Mexico; University of Rochester; University of Texas Health Science  
514 Center at Houston; University of Utah Health; Vassar Brothers Medical Center; Wayne State  
515 University; Western Connecticut Health Network, Danbury Hospital; Western Connecticut  
516 Health Network, Norwalk Hospital.

#### 517 518 Study Plasma

519 The study qualified donor plasma with SARS-CoV-2 positive antibodies after a 1:320 dilution  
520 under FDA IND 19725 protocol. After July 2021, the transfused plasma donor units met the  
521 existing FDA Emergency Use Authorization (EUA) criteria for high titer at EUROIMMUN  
522 arbitrary unit (AU) over 3.5. Many identical apheresis donor plasma units were transfused into 2,  
523 3, or 4 separate recipients. Plasma from 333 unique CCP donations was transfused into the 592  
524 CCP participants. Seventy-five percent of the donor collections were before September 2020  
525 with more than 90% by January 2021 and the last 25 collections by March 2021. These donor  
526 units were previously characterized for full-length anti-Spike IgG geometric mean (GM) titers of  
527 13,053, which corresponded with a more precise area under the curve (AUC) geometric mean of  
528 7938, equaling 243 BAU/mL using the international standards<sup>24</sup>. The median neutralizing  
529 antibody (nAb) titer was 80, with a geometric mean titer of 58, and nAb AUC of 51, equaling  
530 GM 27 IU/mL<sup>24</sup>. The commercial EUROIMMUN arbitrary units (AU) mean was 6 for the  
531 unique donor units<sup>24</sup>.

#### 532 533 Study visits and time periods

534 In these studies, antibody levels were measured at screen before transfusion, within 30 minutes  
535 of transfusion, and various timepoints up to 90 days post-transfusion. Participants were  
536 transfused during pre-Alpha (June 3, 2020 to January 31, 2021), Alpha (February 1, 2021 to July  
537 14, 2021), and Delta (July 15 to October 1, 2021) variant periods. There were just three  
538 participants transfused from July 2 to July 9, 2021 which decreased the number of false  
539 designations. The first Alpha (B1.1.7) confirmed by sequencing was from a participant  
540 transfused February 18, 2021.

541

#### 542 **EUROIMMUN ELISA Assay**

543 The EUROIMMUN anti-SARS-CoV-2 ELISA for IgG (cat. EI2606-9601G) was validated in a  
544 Clinical Laboratory Improvement Amendments-certified (CLIA-certified) laboratory for donor  
545 qualification as positive after a 1:320 dilution as per IND 19725 protocol. The assay was  
546 performed according to the manufacturer's specifications. In a separate research laboratory, the  
547 donor optical density (OD) was measured at 1:101 dilution. The ratio calculated by dividing the  
548 sample OD by the OD of the calibrator from that run constitutes the AU. To measure anti-SARS-  
549 CoV-2 IgG binding, each plate had the following components: 100  $\mu$ L plasma (1:101 dilution,  
550 per the manufacturer's protocol) and 100  $\mu$ L undiluted positive, negative, and calibrator controls.  
551 Plates were washed 3 times, followed by the manufacturer's protocol for addition of conjugate  
552 and substrate. Ratios of 0.8 or higher were considered positive.

553

#### 554 **Indirect ELISA**

555 The ELISA protocol was adapted from a protocol published by the Florian Krammer  
556 laboratory<sup>38</sup>. The 96-well plates (Immulon 4HBX, Thermo Fisher Scientific-Cat#-3855) were  
557 coated with S-RBD of the parent strain at a volume of 50  $\mu$ L of 2  $\mu$ g/mL diluted antigen in  
558 filtered, sterile 1  $\times$  PBS (Thermo Fisher Scientific) at 4°C overnight. The coating buffer was  
559 removed, and the plates were washed 3 times with 300  $\mu$ L 1  $\times$  PBS plus 0.1% Tween-20 (PBST)  
560 wash buffer (Thermo Fisher Scientific) and then blocked with 200  $\mu$ L PBST with 3% nonfat  
561 milk (milk powder, American Bio) by volume for 1 hour at room temperature. All plasma  
562 samples were heat-inactivated at 56°C on a heating block for 1 hour before use and diluted 1:2 in  
563 PBS. Negative control samples were prepared at 1:10 dilutions in PBST in 1% nonfat milk and  
564 plated at a final dilution of 1:100. A mAb against the SARS-CoV-2 Spike protein was used as a  
565 positive control (1:5000 dilution; Sino Biological, 40150-D001). Plasma samples were prepared  
566 in 3-fold serial dilutions starting at 1:20 in PBST in 1% nonfat milk. Blocking solution was  
567 removed, and 100  $\mu$ L diluted plasma was added in duplicate to the plates and incubated at room  
568 temperature for 2 hours. Plates were washed 3 times with PBST wash buffer, and 50  $\mu$ L of  
569 secondary antibody was added to the plates and incubated at room temperature for 1 hour.  
570 Antihuman secondary antibody, Fc-specific total IgG HRP (1:5000 dilution; Thermo Fisher  
571 Scientific, Invitrogen, A18823), was prepared in PBST plus 1% nonfat milk. Plates were washed,  
572 and all residual liquid was removed before the addition of 100  $\mu$ L SIGMAFAST OPD (o-  
573 phenylenediamine dihydrochloride) solution (MilliporeSigma) to each well, followed by  
574 incubation in darkness at room temperature for 10 minutes. To stop the reaction, 50  $\mu$ L 3M HCl  
575 (Thermo Fisher Scientific) was added to each well. The OD of each plate was read at 490 nm  
576 (OD490) on a SpectraMax i3 ELISA Plate Reader (BioTek Instruments). The positive cutoff  
577 value for each plate was calculated by summing the average of the negative values and 3 times  
578 the SD of the negatives. Limits of detection (LOD) were set to half the lowest AUC value at or



579 below 20 titer. The anti-S-RBD IgG titer threshold for seronegative was 180 titer or below. The  
580 seropositive anti-S-RBD IgG ELISA titers represent 3-fold dilutions from 540 to 393,660.

581

### 582 **SARS-CoV-2 Viral Load**

583 Nasopharyngeal specimens obtained at screen were stored in 5 mL of virus transport media at -  
584 70°C on site, then shipped to the central storage facility at Johns Hopkins University. RNA was  
585 extracted from 200 µL transport media with either the Qiagen viral RNA extraction kit (Qiagen,  
586 Hilden, Germany), or the chemagic Viral RNA/DNA 300 H96 kit with chemagic 360 nucleic  
587 acid extraction system (Perkin Elmer), according to manufacturer recommended protocols. Real-  
588 time reverse transcriptase quantitative PCR (RT-qPCR) assays targeting the SARS-CoV2  
589 nucleocapsid (N) gene and the human RNaseP gene were performed based on the methods  
590 described by the US CDC<sup>39</sup>. Primer and FAM-labelled probe sets for CDC nCoV\_N1 and  
591 RNaseP assays were purchased from IDT (Integrated DNA Technologies) as part of the SARS-  
592 CoV2 Research Use Only RUO qPCR primer and probe kit (part number 10006713, 2019\_nCoV  
593 RUO kit). Single-plex assays with equivalent volumes of RNA (or Positive Control, Plasmid-  
594 RNA Standards or Nuclease Free H<sub>2</sub>O for No Template Controls (NTCs)) were performed using  
595 the TaqPath 1-Step RT-qPCR MasterMix (Applied Biosystems, ThermoFisher Scientific) in a  
596 QuantStudio 5 Real-Time PCR system (ThermoFisher Scientific). The SARS-CoV-2 nCoV-N  
597 control plasmid comprised the complete nucleocapsid gene of SARS-CoV-2 isolate Wuhan-Hu-  
598 1, complete genome (GenBank: NC\_045512.2), and the HsRPP30 Positive control contained a  
599 portion of the RNaseP (RPP30) gene. Both plasmid controls were purchased from IDT.  
600 Standards for quantitative analysis were prepared from serial dilutions of the nCoV-N and  
601 HsRPP30 plasmid controls for which target copy number was known. The range covered was  
602 200,000 copies to 320 copies. Standard curve analysis of nCoV\_N1 Ct values was performed by  
603 the QuantStudio Design and Analysis software to determine RNA copies of viral genome. Only  
604 samples with quantities within the standard curve range were given a COVID-19 call/score  
605 “positive”. A Ct value for the RNaseP gene was used to verify that human RNA was present in  
606 each specimen. For samples that did not amplify viral genome or any host cell RNA, a repeat  
607 RT-qPCR was performed and subsequently assigned as “undetermined”.

608

### 609 **SARS-CoV-2 Virus Neutralization Assay**

610 Plasma neutralizing antibodies were determined against WA-1 (SARS-CoV-2/USA-WA1/2020  
611 EPI\_ISL\_404895), which was obtained from BEI Resources, as described previously<sup>22,40</sup>. Two-  
612 fold dilutions of plasma (starting at a 1:20 dilution) were made and infectious virus was added to  
613 the plasma dilutions at a final concentration of  $1 \times 10^5$  TCID<sub>50</sub>/mL (100 TCID<sub>50</sub> per 100 µL).  
614 The samples were incubated with the virus for 1 hour at room temperature, and then 100 µL of  
615 each dilution was added to 1 well of a 96-well plate of VeroE6-TMPRSS2 cells in hexaplicate.  
616 The cells were incubated for 6 hours at 37°C, 5% CO<sub>2</sub>. The inocula were removed, fresh  
617 infection media (IM) was added, and the cells were incubated at 37°C, 5% CO<sub>2</sub> for 2 days. The  
618 cells were fixed by the addition of 100 µL of 4% formaldehyde per well, incubated for at least 4  
619 hours at room temperature, and then stained with Naphthol Blue Black (MilliporeSigma). The  
620 neutralizing antibodies titer was calculated as the highest serum dilution that eliminated the  
621 cytopathic effect in 50% of the wells (NT50), and the AUC was calculated using Graphpad  
622 Prism.

623

### 624 **Statistical analysis**

625 Spearman correlation was used to calculate strength of association between titer and AUC units  
626 for antibody measurement. Fold drops in anti-S-RBD IgG AUC between donor and  
627 corresponding recipients were calculated by dividing the geometric mean of donors by that of  
628 recipients. Statistical differences between donor and post-transfusion recipient antibody levels  
629 were determined by non-parametric Mann-Whitney tests. Using viral load or antibody data,  
630 multiple comparisons across vaccination status, variant, serostatus, or treatment groups were  
631 performed using non-parametric Kruskal-Wallis tests with Dunn's post-hoc corrections. Fishers  
632 exact tests were performed to compare the association of timing of treatment (early or late) and  
633 antibody levels (high or low) with hospitalization using unvaccinated, CCP recipient post-  
634 transfusion (D0) antibody data. Longitudinal recipient antibody data were first log<sub>10</sub>-transformed  
635 and analyzed using a linear mixed-effects regression model, adjusted for variant, age, sex, and  
636 BMI. An interaction term was included to examine how antibody levels changed over time by  
637 treatment (control or CCP) and hospitalization status for unvaccinated participants. Marginal  
638 effects were graphed with 95% confidence intervals. Statistical analyses were performed using  
639 GraphPad Prism 8 (GraphPad Software) and Stata 17 (StataCorp).

#### 640 [Data Availability](#)

641 Source data for figures included in supplementary source data file. Data is available from individual  
642 authors upon request with reply expected in 14 days. Deidentified data from clinical trial will be  
643 deposited in the Vivli server for public access before end of 2023.

#### 644 [Code Availability](#)

645 Unique software or computational code was not created for this study.

## 646 [References](#)

- 647
- 648 1 Offeddu, V. *et al.* High Sporozoite Antibody Titers in Conjunction with Microscopically  
649 Detectable Blood Infection Display Signatures of Protection from Clinical Malaria. *Front*  
650 *Immunol* **8**, 488, doi:10.3389/fimmu.2017.00488 (2017).
- 651 2 Kc, N. *et al.* Increased levels of anti-PfCSP antibodies in post-pubertal females versus  
652 males immunized with PfSPZ Vaccine does not translate into increased protective  
653 efficacy. *Front Immunol* **13**, 1006716, doi:10.3389/fimmu.2022.1006716 (2022).
- 654 3 Gilbert, P. B. *et al.* A Covid-19 Milestone Attained - A Correlate of Protection for  
655 Vaccines. *N Engl J Med* **387**, 2203-2206, doi:10.1056/NEJMp2211314 (2022).
- 656 4 Gilbert, P. B. *et al.* Immune correlates analysis of the mRNA-1273 COVID-19 vaccine  
657 efficacy clinical trial. *Science*, eab3435 (2021).
- 658 5 Goldblatt, D., Alter, G., Crotty, S. & Plotkin, S. A. Correlates of protection against  
659 SARS-CoV-2 infection and COVID-19 disease. *Immunol Rev* **310**, 6-26,  
660 doi:10.1111/imr.13091 (2022).
- 661 6 Goldblatt, D. *et al.* Towards a population-based threshold of protection for COVID-19  
662 vaccines. *Vaccine* **40**, 306-315, doi:10.1016/j.vaccine.2021.12.006 (2022).
- 663 7 Earle, K. A. *et al.* Evidence for antibody as a protective correlate for COVID-19  
664 vaccines. *Vaccine* **39**, 4423-4428, doi:10.1016/j.vaccine.2021.05.063 (2021).
- 665 8 Khoury, D. S. *et al.* Neutralizing antibody levels are highly predictive of immune  
666 protection from symptomatic SARS-CoV-2 infection. *Nat Med* **27**, 1205-1211,  
667 doi:10.1038/s41591-021-01377-8 (2021).

- 668 9 Stadler, E. *et al.* Determinants of passive antibody efficacy in SARS-CoV-2 infection.  
669 *medRxiv*, 2022.2003.2021.22272672, doi:10.1101/2022.03.21.22272672 (2022).
- 670 10 Cromer, D. *et al.* Predicting vaccine effectiveness against severe COVID-19 over time  
671 and against variants: a meta-analysis. *Nat Commun* **14**, 1633, doi:10.1038/s41467-023-  
672 37176-7 (2023).
- 673 11 Cromer, D. *et al.* Neutralising antibody titres as predictors of protection against SARS-  
674 CoV-2 variants and the impact of boosting: a meta-analysis. *Lancet Microbe* **3**, e52-e61,  
675 doi:10.1016/S2666-5247(21)00267-6 (2022).
- 676 12 Dougan, M. *et al.* Bebtelovimab, alone or together with bamlanivimab and etesevimab, as  
677 a broadly neutralizing monoclonal antibody treatment for mild to moderate, ambulatory  
678 COVID-19. *medRxiv*, 2022.2003.2010.22272100, doi:10.1101/2022.03.10.22272100  
679 (2022).
- 680 13 Weinreich, D. M. *et al.* REGN-COV2, a Neutralizing Antibody Cocktail, in Outpatients  
681 with Covid-19. *N Engl J Med* **384**, 238-251, doi:10.1056/NEJMoa2035002 (2021).
- 682 14 Gupta, A. *et al.* Early Treatment for Covid-19 with SARS-CoV-2 Neutralizing Antibody  
683 Sotrovimab. *N Engl J Med*, doi:10.1056/NEJMoa2107934 (2021).
- 684 15 Chen, P. *et al.* SARS-CoV-2 Neutralizing Antibody LY-CoV555 in Outpatients with  
685 Covid-19. *N Engl J Med* **384**, 229-237, doi:10.1056/NEJMoa2029849 (2021).
- 686 16 Group, A. C.-.-T. f. I. w. C.-S. Tixagevimab-cilgavimab for treatment of patients  
687 hospitalised with COVID-19: a randomised, double-blind, phase 3 trial. *Lancet Respir*  
688 *Med* **10**, 972-984, doi:10.1016/S2213-2600(22)00215-6 (2022).
- 689 17 Montgomery, H. *et al.* Efficacy and safety of intramuscular administration of  
690 tixagevimab-cilgavimab for early outpatient treatment of COVID-19 (TACKLE): a phase  
691 3, randomised, double-blind, placebo-controlled trial. *Lancet Respir Med* **10**, 985-996,  
692 doi:10.1016/S2213-2600(22)00180-1 (2022).
- 693 18 Group, A. C.-T. f. I. w. C.-S. Efficacy and safety of two neutralising monoclonal  
694 antibody therapies, sotrovimab and BRII-196 plus BRII-198, for adults hospitalised with  
695 COVID-19 (TICO): a randomised controlled trial. *Lancet Infect Dis* **22**, 622-635,  
696 doi:10.1016/S1473-3099(21)00751-9 (2022).
- 697 19 Gottlieb, R. L. *et al.* Early Remdesivir to Prevent Progression to Severe Covid-19 in  
698 Outpatients. *N Engl J Med* **386**, 305-315, doi:10.1056/NEJMoa2116846 (2022).
- 699 20 Beigel, J. H. *et al.* Remdesivir for the Treatment of Covid-19 - Final Report. *N Engl J*  
700 *Med* **383**, 1813-1826, doi:10.1056/NEJMoa2007764 (2020).
- 701 21 Klein, S. L. *et al.* Sex, age, and hospitalization drive antibody responses in a COVID-19  
702 convalescent plasma donor population. *J Clin Invest* **130**, 6141-6150,  
703 doi:10.1172/JCI142004 (2020).
- 704 22 Li, M. *et al.* Convalescent plasma with a high level of virus-specific antibody effectively  
705 neutralizes SARS-CoV-2 variants of concern. *Blood Adv*, 2022.2003.2001.22271662,  
706 doi:10.1182/bloodadvances.2022007410 (2022).
- 707 23 Sullivan, D. J., Franchini, M., Joyner, M. J., Casadevall, A. & Focosi, D. Analysis of  
708 anti-SARS-CoV-2 Omicron-neutralizing antibody titers in different vaccinated and  
709 unvaccinated convalescent plasma sources. *Nature Communications* **13**, 6478,  
710 doi:10.1038/s41467-022-33864-y (2022).
- 711 24 Sullivan, D. J. *et al.* Early Outpatient Treatment for Covid-19 with Convalescent Plasma.  
712 *N Engl J Med*, doi:10.1056/NEJMoa2119657 (2022).

- 713 25 Wolfel, R. *et al.* Virological assessment of hospitalized patients with COVID-2019.  
714 *Nature*, doi:10.1038/s41586-020-2196-x (2020).
- 715 26 Puhach, O. *et al.* Infectious viral load in unvaccinated and vaccinated individuals infected  
716 with ancestral, Delta or Omicron SARS-CoV-2. *Nat Med* **28**, 1491-1500,  
717 doi:10.1038/s41591-022-01816-0 (2022).
- 718 27 Elie, B. *et al.* Variant-specific SARS-CoV-2 within-host kinetics. *J Med Virol* **94**, 3625-  
719 3633, doi:10.1002/jmv.27757 (2022).
- 720 28 Shoham, S. *et al.* Transfusing convalescent plasma as post-exposure prophylaxis against  
721 SARS-CoV-2 infection: a double-blinded, phase 2 randomized, controlled trial. *Clin*  
722 *Infect Dis*, doi:10.1093/cid/ciac372 (2022).
- 723 29 Levine, A. C. *et al.* COVID-19 Convalescent Plasma Outpatient Therapy to Prevent  
724 Outpatient Hospitalization: A Meta-analysis of Individual Participant Data From Five  
725 Randomized Trials. *Clinical Infectious Diseases*, doi:10.1093/cid/ciad088 (2023).
- 726 30 McDyer, J. F. *et al.* COVID-19 convalescent plasma boosts early antibody titer and does  
727 not influence the adaptive immune response. *JCI Insight*, doi:10.1172/jci.insight.167890  
728 (2023).
- 729 31 Sullivan, D. *et al.* Early Outpatient Treatment for Covid-19 with Convalescent Plasma. *N*  
730 *Engl J Med*, doi:10.1056/NEJMoa2119657 (2021).
- 731 32 Kuno, T., Takahashi, M. & Egorova, N. N. The Association Between Convalescent  
732 Plasma Treatment and Survival of Patients with COVID-19. *J Gen Intern Med* **36**, 2528-  
733 2531, doi:10.1007/s11606-021-06894-3 (2021).
- 734 33 Mink, S. *et al.* Evaluation of SARS-CoV-2 antibody levels on hospital admission as a  
735 correlate of protection against mortality. *Journal of internal medicine*,  
736 doi:10.1111/joim.13606 (2023).
- 737 34 Lopez Bernal, J. *et al.* Effectiveness of the Pfizer-BioNTech and Oxford-AstraZeneca  
738 vaccines on covid-19 related symptoms, hospital admissions, and mortality in older  
739 adults in England: test negative case-control study. *Bmj* **373**, n1088,  
740 doi:10.1136/bmj.n1088 (2021).
- 741 35 Sullivan, H. C. & Roback, J. D. Convalescent Plasma: Therapeutic Hope or Hopeless  
742 Strategy in the SARS-CoV-2 Pandemic. *Transfus Med Rev* **34**, 145-150,  
743 doi:10.1016/j.tmr.2020.04.001 (2020).
- 744 36 Korley, F. K. *et al.* Early Convalescent Plasma for High-Risk Outpatients with Covid-19.  
745 *N Engl J Med* **385**, 1951-1960, doi:10.1056/NEJMoa2103784 (2021).
- 746 37 Casadevall, A., Pirofski, L. A. & Joyner, M. J. The Principles of Antibody Therapy for  
747 Infectious Diseases with Relevance for COVID-19. *mBio* **12**, doi:10.1128/mBio.03372-  
748 20 (2021).
- 749 38 Amanat, F. *et al.* A serological assay to detect SARS-CoV-2 seroconversion in humans.  
750 *medRxiv*, 2020.2003.2017.20037713, doi:10.1101/2020.03.17.20037713 (2020).
- 751 39 Lu, X. *et al.* US CDC Real-Time Reverse Transcription PCR Panel for Detection of  
752 Severe Acute Respiratory Syndrome Coronavirus 2. *Emerg Infect Dis* **26**, 1654-1665,  
753 doi:10.3201/eid2608.201246 (2020).
- 754 40 Park, H. S. *et al.* Adaptive immune responses in vaccinated patients with symptomatic  
755 SARS-CoV-2 Alpha infection. *JCI Insight* **7**, doi:10.1172/jci.insight.155944 (2022).
- 756



## 757 Acknowledgements

758 Supported by a contract (W911QY2090012, to Dr. Sullivan) with the Joint Program Executive  
759 Office for Chemical, Biological, Radiological and Nuclear Defense of the Department of  
760 Defense, in collaboration with the Defense Health Agency; Bloomberg Philanthropies; the State  
761 of Maryland; a grant (3R01AI152078-01S1, to Dr. Casadevall) from the National Institutes of  
762 Health (NIH) National Institute of Allergy and Infectious Diseases (NIAID); a grant  
763 (U24TR001609-S3, to Dr. Hanley) from the NIH National Center for Advancing Translational  
764 Sciences; a grant (1K23HL151826NIH, to Dr. Bloch) from the National Heart, Lung, and Blood  
765 Institute; the Division of Intramural Research, NIAID, NIH; the Mental Wellness Foundation;  
766 the Moriah Fund; Octapharma; the Healthnetwork Foundation; and the Shear Family Foundation.  
767 The study sponsors did not contribute to the study design, the collection, analysis, and  
768 interpretation of data, and the decision to submit the paper for publication.

769  
770 We thank all the trial participants who generously gave of their time and donated biologic  
771 specimens. We thank Dr. Geeta Sood for a critical review of the manuscript.

## 772 Author Contributions

773 K.L., N.M., D.E.F, L.J.A., B.L., D.H., A.C., S.S., E.B., K.G., A.T., O.L., A.P., S.L.K., D.J.S  
774 conceived and/or designed the work. HS.P., C.B., A.Yin, J.L., C.C., Y.E., R.F., O.B., J.S., T.G.,  
775 P.C., J.W., N.N., M.B., A.T., O.L., S.L.K., D.J.S contributed to the experimental design and  
776 procedures for the anti-S-RBD antibody level measurement. M.L., S.Y., I.S., A.J., A.P.  
777 contributed to the experimental design and procedure for the viral load and neutralizing antibody  
778 measurements. A.G.S., G.M., Y.F., B.F., S.H., A.L., B.M., E.S., S.A., M.H., J.B., J.C., J.H.P.,  
779 J.G., J.P., P.B, W.R., M.E.C, J.H., B.G., V.C., D.C., K.O., M.A., L.H., C.S., D.N.F., M.Z., E.C.,  
780 J.R., S.G.K., C.M., M.R., A.Yarava, K.L., N.M., A.G., N.K., A.S., D.E.F, D.A.J., L.J.A.,  
781 D.M.S., B.L., S.E., S.B., T.G., A.Z., D.H., A.C., S.S., E.B., K.G., A.T., O.L., A.P., S.L.K., D.J.S  
782 conducted/contributed to the clinical study and/or collected clinical data. HS.P., C.B., A.Yin,  
783 J.L., C.C., M.L., S.Y., I.S., A.J., M.R., R.F., O.B., J.S., J.O., T.G., P.C., D.H., A.C., K.G., A.T.,  
784 O.L., A.P., S.L.K., D.J.S contributed to data processing and analyses specific to this work.  
785 HS.P., C.B., A.Yin, A.C., A.P., S.L.K., D.J.S drafted the manuscript. All authors provided final  
786 approval of the version to be published.

## 787 Competing Interests

788 TG- Paid consultant and employee of Fenwal, a Fresenius Kabi company; AC- Scientific  
789 Advisory Board of Sabtherapeutics (cow-derived human immunoglobulins COVID-19 treatment  
790 and other infectious diseases) and Ortho Diagnostics Speakers Bureau; EB- member of the FDA  
791 Blood Products Advisory Committee; SS reports research grants; F2G, Cidara, Ansun, Zeteo,  
792 Emergent Biosolutions: personal fees as consultant, advisory board, data safety monitoring board  
793 member; Celltrion, Adagio, Immunome, Adamis, Karyopharm, Intermountain Health: Stock  
794 options: Immunome; CS: Centers for Disease Control and Prevention, Merck, Pfizer: Research  
795 Grants. All other authors report no relevant disclosures.

796  
797

798 **Tables**

799 Table 1 Baseline characteristics for unvaccinated control and CCP recipients and the joint  
 800 stratification based upon symptom onset to transfusion as early or late transfusion ( $\leq 5$  or  $> 5$  days  
 801 from symptom onset) and high or low antibody levels above or below recipient anti-S-RBD IgG  
 802 at 150 AUC.

| Unvaccinated                       | Control    | CCP        | CCP early high | CCP early low | CCP late high | CCP late low | CCP late (high&low) and early low | Control early |
|------------------------------------|------------|------------|----------------|---------------|---------------|--------------|-----------------------------------|---------------|
| <b>Number</b>                      | 479        | 472*       | 102            | 104           | 164           | 102          | 370                               | 207           |
| <b>Median age (IQR)</b>            | 44 (33-55) | 42 (32-54) | 42 (30-51)     | 46 (33-56)    | 41 (31-55)    | 44 (33-54)   | 44 (32-55)                        | 43 (32-56)    |
| <b>Mean Age</b>                    | 44         | 43         | 41             | 45            | 43            | 44           | 44                                | 45            |
| <b>Age Category, n (%)</b>         |            |            |                |               |               |              |                                   |               |
| 18-49 yr                           | 285 (60)   | 310 (66)   | 74 (73)        | 63 (61)       | 107 (64)      | 66 (65)      | 236 (64)                          | 127 (61)      |
| 50-85 yr                           | 194 (40)   | 162 (34)   | 28 (27)        | 41 (39)       | 57 (34)       | 36 (35)      | 134 (36)                          | 80 (39)       |
| <b>Sex, n (%)</b>                  |            |            |                |               |               |              |                                   |               |
| Female                             | 283 (59)   | 255 (54)   | 58 (57)        | 52 (50)       | 90 (55)       | 55 (54)      | 197 (53)                          | 115 (56)      |
| Male                               | 196 (41)   | 217 (46)   | 44 (43)        | 52 (50)       | 74 (45)       | 47 (46)      | 173 (47)                          | 92 (44)       |
| <b>Race, n (%)</b>                 |            |            |                |               |               |              |                                   |               |
| Asian                              | 17 (4)     | 18 (4)     | 0 (0)          | 5 (5)         | 10 (6)        | 3 (3)        | 18 (5)                            | 13 (6)        |
| Black                              | 66 (14)    | 74 (16)    | 12 (12)        | 14 (13)       | 34 (20)       | 14 (14)      | 62 (17)                           | 30 (14)       |
| American Indian Pacific Islander   | 11 (2)     | 9 (2)      | 1 (1)          | 3 (3)         | 3 (2)         | 2 (2)        | 8 (2)                             | 8 (4)         |
| Other race/not reported            | 2 (0)      | 2 (0)      | 0 (0)          | 0 (0)         | 1 (1)         | 1 (1)        | 2 (1)                             | 1 (0)         |
| White                              | 7 (1)      | 5 (1)      | 2 (2)          | 1 (1)         | 1 (1)         | 1 (1)        | 3 (1)                             | 4 (2)         |
| <b>Ethnicity, n (%)</b>            |            |            |                |               |               |              |                                   |               |
| Hispanic or Latino                 | 386 (81)   | 367 (78)   | 86 (84)        | 83 (80)       | 117 (70)      | 81 (79)      | 281 (76)                          | 159 (77)      |
| <b>BMI Category, n (%)</b>         |            |            |                |               |               |              |                                   |               |
| BMI <30                            | 261 (58)   | 274 (61)   | 64 (65)        | 56 (57)       | 97 (63)       | 57 (59)      | 210 (60)                          | 112 (57)      |
| BMI $\geq 30$                      | 190 (42)   | 172 (39)   | 34 (35)        | 43 (43)       | 56 (37)       | 39 (41)      | 138 (40)                          | 85 (43)       |
| <b>Any Comorbidity, n (%)</b>      |            |            |                |               |               |              |                                   |               |
| Any Comorbidity                    | 196 (41)   | 193 (41)   | 45 (44)        | 45 (43)       | 56 (34)       | 47 (46)      | 148 (40)                          | 88 (43)       |
| <b>Hypertension, n (%)</b>         |            |            |                |               |               |              |                                   |               |
| Hypertension                       | 117 (24)   | 119 (25)   | 27 (26)        | 27 (26)       | 33 (20)       | 32 (31)      | 92 (25)                           | 52 (25)       |
| <b>Diabetes, n (%)</b>             |            |            |                |               |               |              |                                   |               |
| Diabetes                           | 47 (10)    | 37 (8)     | 5 (5)          | 8 (8)         | 14 (8)        | 10 (10)      | 32 (9)                            | 19 (9)        |
| <b>Asthma, n (%)</b>               |            |            |                |               |               |              |                                   |               |
| Asthma                             | 59 (12)    | 51 (11)    | 13 (13)        | 11 (11)       | 17 (10)       | 10 (10)      | 38 (10)                           | 25 (12)       |
| <b>HIV, n (%)</b>                  |            |            |                |               |               |              |                                   |               |
| HIV                                | 12 (3)     | 11 (2)     | 2 (2)          | 4 (4)         | 4 (2)         | 1 (1)        | 9 (2)                             | 4 (2)         |
| <b>Pregnancy, n (%)</b>            |            |            |                |               |               |              |                                   |               |
| Pregnancy                          | 0 (0)      | 2 (0)      | 0 (0)          | 1 (1)         | 0 (0)         | 1 (1)        | 2 (1)                             | 0 (0)         |
| <b>Serostatus at Screen, n (%)</b> |            |            |                |               |               |              |                                   |               |
| Seronegative*                      | 368 (77)   | 361 (76)   | 74 (73)        | 97 (93)       | 97 (59)       | 93 (91)      | 287 (78)                          | 167 (81)      |
| Seropositive*                      | 92 (19)    | 107 (23)   | 28 (27)        | 6 (6)         | 66 (40)       | 7 (7)        | 79 (21)                           | 30 (14)       |
| No screen bloods                   | 19 (4)     | 4 (1)      | 0 (0)          | 1 (1)         | 1 (1)         | 2 (2)        | 4 (1)                             | 10 (5)        |

803 \*13 CCP participants were excluded due to missing post-transfusion anti-S-RBD IgG levels.

804  
 805  
 806



Extended Table 1 Segregation of time (early or late) and antibody level (high or low) to hospitalizations in both unvaccinated groups. Early is symptom onset to transfusion within 5 days and late is after 5 days. The antibody levels are measured by recipient anti-S-RBD IgG inverse dilutional titer and AUC as well as donor anti-S-RBD IgG titer and AUC along with virus neutralizations from donor with titers above the median and AUC at or above the geometric mean. Data are n (%). P values by Fisher's exact tests were calculated by comparing proportion of early and high hospitalizations/non-hospitalizations to the remaining CCP participants, to all unvaccinated controls and to the unvaccinated controls transfused within 5 days of symptom onset.

|                                                                 | Early/<br>high<br>CCP | Early/<br>low<br>CCP | Late/<br>high<br>CCP | Late/<br>low<br>CCP | Early/low<br>and<br>Late/high<br>and low | Unvaccinated<br>control<br>plasma | Unvaccinated<br>early control<br>plasma |
|-----------------------------------------------------------------|-----------------------|----------------------|----------------------|---------------------|------------------------------------------|-----------------------------------|-----------------------------------------|
| <b>Recipient anti-S-RBD<br/>IgG AUC <math>\geq 150</math></b>   |                       |                      |                      |                     | p=0.03                                   | p=0.001                           | p=0.00005                               |
| Hospitalized, n (%)                                             | 0 (0)                 | 5 (4.8)              | 6 (3.7)              | 6 (5.9)             | 17 (4.6)                                 | 36 (7.5)                          | 24 (11.6)                               |
| Total                                                           | 102                   | 104                  | 164                  | 102                 | 370                                      | 479                               | 207                                     |
| <b>Donor anti-S-RBD<br/>IgG AUC <math>\geq 3286</math></b>      |                       |                      |                      |                     | p=0.21                                   | p=0.02                            | p=0.0007                                |
| Hospitalized, n (%)                                             | 1 (1)                 | 4 (3.6)              | 6 (4.8)              | 5 (3.6)             | 15 (4.0)                                 | 36 (7.5)                          | 24 (11.6)                               |
| Total                                                           | 96                    | 110                  | 125                  | 140                 | 375                                      | 479                               | 207                                     |
| <b>Donor nAb AUC <math>\geq 58</math></b>                       |                       |                      |                      |                     | p=0.016                                  | p=0.0006                          | p=0.00002                               |
| Hospitalized, n (%)                                             | 0 (0)                 | 5 (5.6)              | 6 (3.8)              | 5 (4.8)             | 16 (4.4)                                 | 36 (7.5)                          | 24 (11.6)                               |
| Total                                                           | 113                   | 90                   | 159                  | 104                 | 353                                      | 479                               | 207                                     |
| <b>Donor EUROIMMUN<br/>AU <math>\geq 6</math></b>               |                       |                      |                      |                     | p=0.052                                  | p=0.003                           | p=0.0002                                |
| Hospitalized, n (%)                                             | 0 (0)                 | 5 (4.2)              | 5 (4.8)              | 6 (3.8)             | 16 (4.2)                                 | 36 (7.5)                          | 24 (11.6)                               |
| Total                                                           | 86                    | 119                  | 105                  | 158                 | 382                                      | 479                               | 207                                     |
| <b>Recipient anti-S-RBD<br/>IgG titer <math>&gt; 540</math></b> |                       |                      |                      |                     | p=0.39                                   | p=0.06                            | p=0.01                                  |
| Hospitalized, n (%)                                             | 0 (0)                 | 5 (3.1)              | 3 (3.1)              | 9 (3.7)             | 17 (5.2)                                 | 36 (7.5)                          | 24 (11.6)                               |
| Total                                                           | 45                    | 161                  | 97                   | 169                 | 427                                      | 479                               | 207                                     |
| <b>Donor anti-S-RBD<br/>IgG titer <math>&gt; 4860</math></b>    |                       |                      |                      |                     | p=0.33                                   | p=0.02                            | p=0.0011                                |
| Hospitalized, n (%)                                             | 1 (1.1)               | 4 (3.5)              | 6 (5.3)              | 5 (3.3)             | 15 (3.9)                                 | 36 (7.5)                          | 24 (11.6)                               |
| Total                                                           | 91                    | 115                  | 114                  | 151                 | 380                                      | 479                               | 207                                     |
| <b>Donor nAb titer <math>\geq 80</math></b>                     |                       |                      |                      |                     | p=0.03                                   | p=0.001                           | p=0.00005                               |
| Hospitalized, n (%)                                             | 0 (0)                 | 5 (4.9)              | 6 (4.1)              | 5 (4.3)             | 16 (4.4)                                 | 36 (7.5)                          | 24 (11.6)                               |
| Total                                                           | 101                   | 102                  | 148                  | 115                 | 365                                      | 479                               | 207                                     |
| <b>Donor EUROIMMUN<br/>BAU <math>\geq 600</math></b>            |                       |                      |                      |                     | p=0.052                                  | p=0.003                           | p=0.0002                                |
| Hospitalized, n (%)                                             | 0 (0)                 | 5 (4.2)              | 5 (4.8)              | 6 (3.8)             | 16 (4.2)                                 | 36 (7.5)                          | 24 (11.6)                               |
| Total                                                           | 86                    | 119                  | 105                  | 158                 | 382                                      | 479                               | 207                                     |

Extended Table 2

Unvaccinated screen seropositive participants who were hospitalized

| <b>Participant No.</b> | <b>Treatment group</b> | <b>Screen nasal viral load</b> | <b>Days from symptom onset to transfusion</b> | <b>Variant</b> | <b>Screen RBD Titer</b> | <b>Screen RBD AUC</b> |
|------------------------|------------------------|--------------------------------|-----------------------------------------------|----------------|-------------------------|-----------------------|
| 1                      | Control                | 320                            | 5                                             | pre-Alpha      | 540                     | 134                   |
| 2                      | Control                | 320                            | 4                                             | pre-Alpha      | 4860                    | 1605                  |
| 3                      | Control                | 23271                          | 4                                             | pre-Alpha      | 540                     | 87                    |
| 4                      | Control                | 12168                          | 3                                             | Alpha          | 540                     | 123                   |
| 5                      | Control                | 498                            | 9                                             | Alpha          | 14580                   | 4302                  |
| 6                      | CCP                    | 320                            | 7                                             | pre-Alpha      | 1620                    | 406                   |
| 7                      | CCP                    | 4219                           | 7                                             | Alpha          | 1620                    | 239                   |

**Extended Table 3.**

Full study participant characteristics during variant periods

|                                     | <b>Pre-Alpha<br/>n (%)</b> | <b>Alpha<br/>n (%)</b> | <b>Delta<br/>n (%)</b> | <b>Total<br/>n (%)</b> |
|-------------------------------------|----------------------------|------------------------|------------------------|------------------------|
| <b>Number</b>                       | 693                        | 260                    | 228                    | 1181                   |
| <b>Treatment</b>                    |                            |                        |                        |                        |
| CCP                                 | 349 (50)                   | 128 (49)               | 115 (50)               | 592 (50)               |
| Control                             | 344 (50)                   | 132 (51)               | 113 (50)               | 589 (50)               |
| <b>Median Age (IQR)</b>             | 47 (35-58)                 | 40 (31-49)             | 36 (29-47)             | 43 (32-54)             |
| <b>Mean Age</b>                     | 47                         | 40                     | 38                     | 44                     |
| <b>Age Category</b>                 |                            |                        |                        |                        |
| 18-49 yr                            | 388 (56)                   | 197 (76)               | 185 (81)               | 770 (65)               |
| 50-85 yr                            | 305 (44)                   | 63 (24)                | 43 (19)                | 411 (35)               |
| <b>Sex</b>                          |                            |                        |                        |                        |
| Female                              | 384 (55)                   | 151 (58)               | 140 (61)               | 675 (57)               |
| Male                                | 309 (45)                   | 109 (42)               | 88 (39)                | 506 (43)               |
| <b>Race</b>                         |                            |                        |                        |                        |
| Asian                               | 25 (4)                     | 11 (4)                 | 8 (4)                  | 44 (4)                 |
| Black                               | 78 (11)                    | 45 (17)                | 40 (18)                | 163 (14)               |
| American Indian                     | 16 (2)                     | 0 (0)                  | 1 (0)                  | 17 (1)                 |
| Pacific Islander                    | 3 (0)                      | 1 (0)                  | 0 (0)                  | 4 (0)                  |
| Other/Not Reported                  | 8 (1)                      | 2 (1)                  | 6 (3)                  | 16 (1)                 |
| White                               | 560 (81)                   | 201 (77)               | 173 (76)               | 934 (79)               |
| Hispanic or Latino                  | 79 (11)                    | 40 (15)                | 51 (22)                | 170 (14)               |
| <b>BMI Category</b>                 |                            |                        |                        |                        |
| BMI<30                              | 395 (57)                   | 139 (53)               | 145 (64)               | 679 (57)               |
| BMI =>30                            | 250 (36)                   | 116 (45)               | 79 (35)                | 445 (38)               |
| <b>Any Comorbidity</b>              | 310 (45)                   | 98 (38)                | 51 (22)                | 459 (39)               |
| <b>Hypertension</b>                 | 199 (29)                   | 52 (20)                | 25 (11)                | 276 (23)               |
| <b>Diabetes</b>                     | 72 (10)                    | 18 (7)                 | 9 (4)                  | 99 (8)                 |
| <b>Asthma</b>                       | 84 (12)                    | 27 (10)                | 21 (9)                 | 132 (11)               |
| <b>HIV</b>                          | 17 (2)                     | 7 (3)                  | 1 (0)                  | 25 (2)                 |
| <b>Pregnant</b>                     | 1 (0)                      | 0 (0)                  | 2 (1)                  | 3 (0)                  |
| <b>Vaccination Status at Screen</b> |                            |                        |                        |                        |
| Unvaccinated                        | 632 (91)                   | 200 (77)               | 79 (35)                | 911 (77)               |
| Seronegative*                       | 501 (82)                   | 154 (77)               | 42 (54)                | 697 (78)               |
| Seropositive*                       | 110 (18)                   | 46 (23)                | 36 (46)                | 192 (22)               |

|                                |          |               |          |          |
|--------------------------------|----------|---------------|----------|----------|
| No screening samples           | 21       | 0             | 1        | 22       |
| Partly Vaccinated              | 20 (3)   | 28 (11)       | 9 (4)    | 57 (5)   |
| Seronegative*                  | 6 (30)   | 9 (32)        | 2 (22)   | 17 (30)  |
| Seropositive*                  | 14 (70)  | 19 (68)       | 7 (78)   | 40 (70)  |
| Fully Vaccinated               | 0 (0)    | 21 (8)        | 138 (61) | 159 (13) |
| Seronegative*                  | 0 (0)    | 0 (0)         | 1 (1)    | 1 (1)    |
| Seropositive*                  | 0 (0)    | 21 (100)      | 129 (99) | 150 (99) |
| No screening samples           | 0        | 0             | 8        | 8        |
| <b>Vaccinated During Study</b> | 100 (14) | 60 (23)       | 5 (2)    | 165 (14) |
| <b>Hospitalized</b>            | 41(6)    | 11 (4)        | 2 (1)    | 54 (5)   |
| Seronegative*                  | 35 (90)  | 8 (1-PV) (73) | 1 (100)  | 44 (86)  |
| Seropositive*                  | 4 (10)   | 3 (27)        | 0        | 7 (14)   |
| No screening samples           | 2        | 0             | 1        | 3        |

## Figures

**Fig. 1 Screen seropositive participants and post-transfusion seronegative participants.** A) Spearman correlation of unique donor anti-S-RBD titer and AUC (n=318) B) Unvaccinated and not hospitalized recipient screen seronegative anti-S-RBD AUC (n=338) with corresponding donor unit antibody levels transfused into matched recipients and C) Seronegative recipients (n=15) subsequently hospitalized after transfusion. D) Antibody levels in the 199 (21%) of unvaccinated, but seropositive recipients at screening before transfusion in the jointly stratified groups. There were no significant differences in screening antibody levels between control and CCP recipients. E) The same 199 unvaccinated seropositive participant antibody levels stratified by days from symptom onset to transfusion. All point estimates are shown with error bars indicating the geometric mean with geometric SD. Numbers above the x-axis represent geometric mean (GM), the number in the group (n). \*\*\*p<0.001 by non-parametric Kruskal-Wallis multiple comparisons test with Dunn's post-hoc corrections or Mann-Whitney test. The dashed line in B-E represents the upper post-transfusion 150 AUC recipient's threshold.

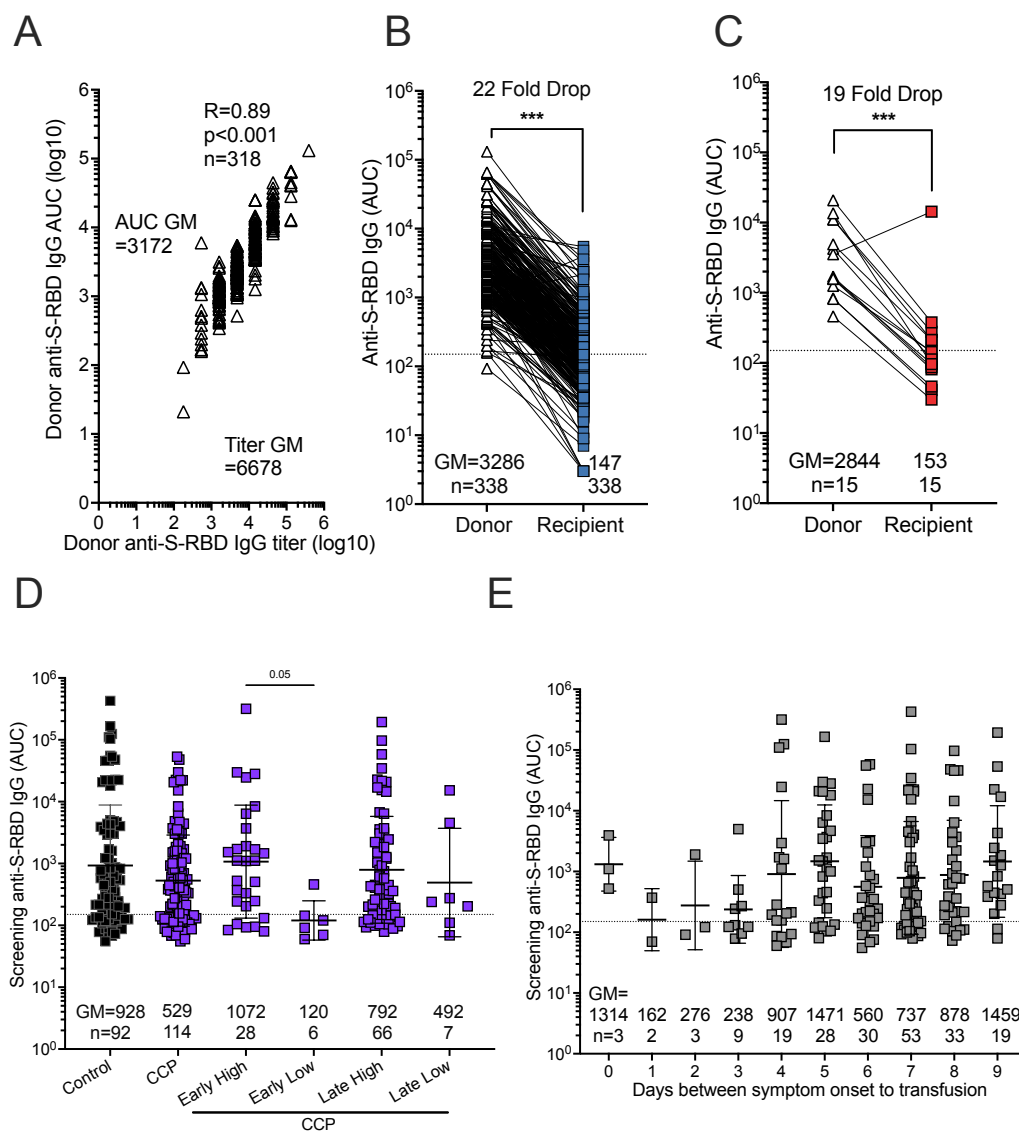

**Fig. 2 CCP participant post-transfusion recipient antibody levels stratified by duration from symptom onset to transfusion.** Post-transfusion recipient antibody levels segregated by duration from symptom onset to transfusion. Recipient post-transfusion anti-S-RBD IgG AUC levels of subsequently hospitalized (red dots) and non-hospitalized within 28 days from transfusion (blue dots) were plotted by days from symptom onset to transfusion, segregating by early ( $\leq 5$  days of symptom onset) or late ( $>5$  days after symptom onset) transfusion and high ( $\geq 150$  AUC) or low ( $<150$  AUC) antibody levels. Early transfusion with high antibody levels measured 30 minutes post-transfusion (D0) among unvaccinated, CCP recipients had the lowest proportion of hospitalizations (0%) whereas late transfusion with low antibody levels had the greatest proportion of hospitalizations (5.9%). Numbers in each quadrant represent the proportion of hospitalization and sample size for each category.

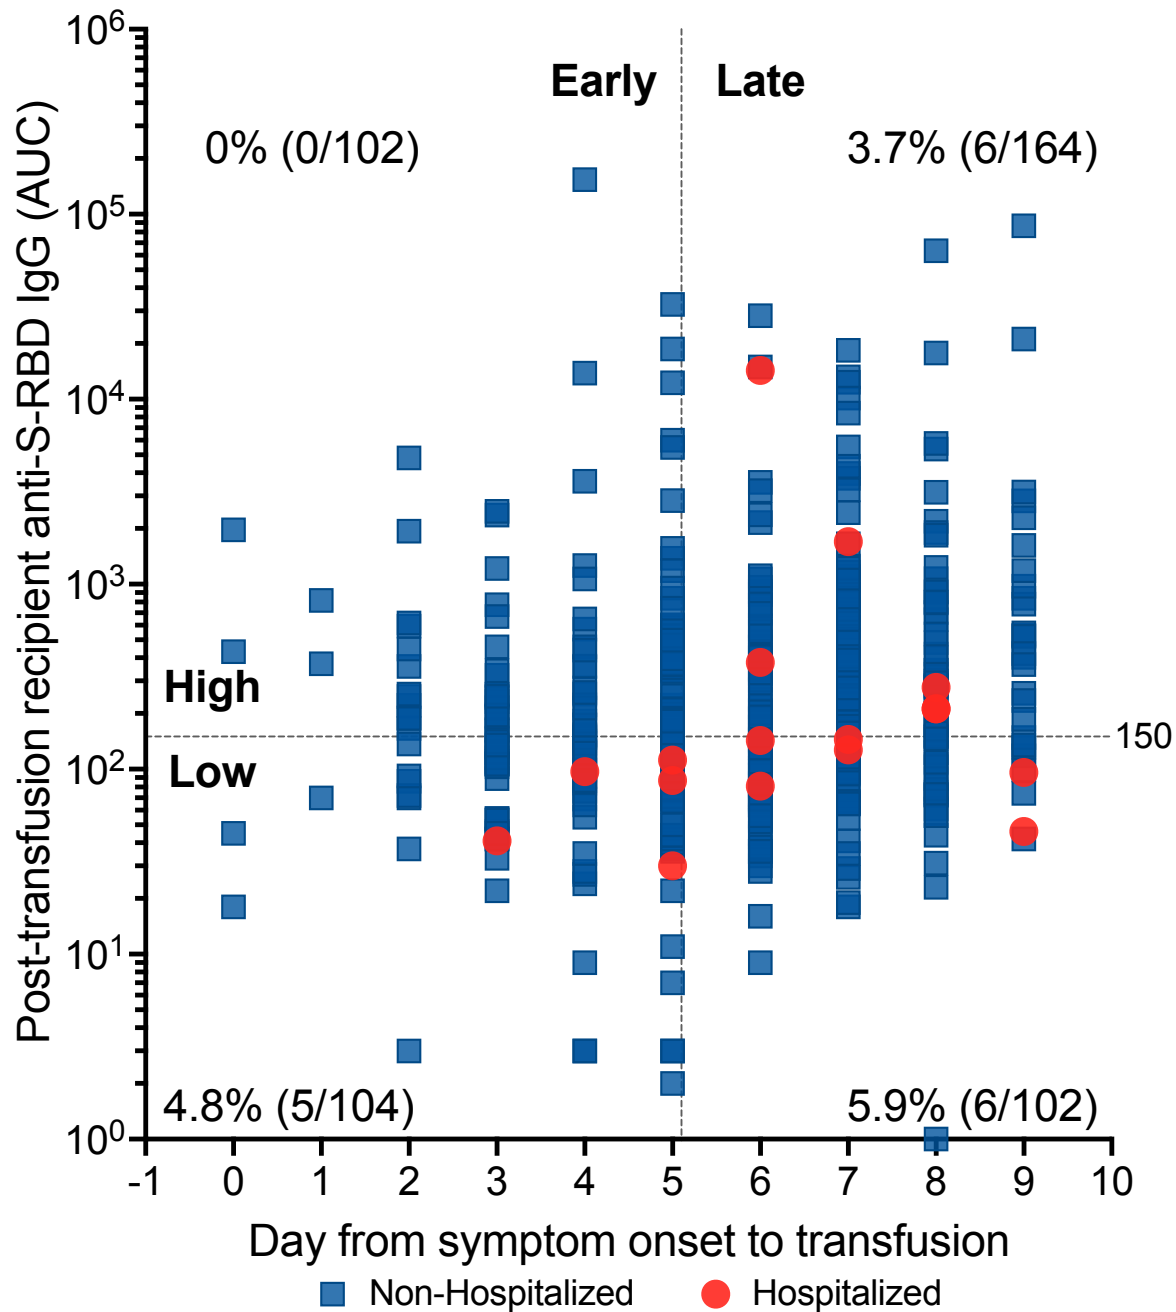



**Fig. 3 Mapped recipients with donor unit antibody levels stratified by duration from symptom onset to transfusion.** Donor unit antibody levels that correspond with unvaccinated, CCP recipient antibody data segregated by duration from symptom onset to transfusion. A) Early recipients with donor anti-S-RBD IgG AUC levels over 3286 were found to correlate with the lowest proportion of hospitalizations (1.1%). B) Early recipients with donor neutralization antibody (nAb) AUC levels greater than the geometric mean of 58 also had the lowest proportion of hospitalizations (0%). The percentage of recipients hospitalized is indicated in each quadrant of the graph. Numbers in each quadrant represent the proportion of hospitalization and sample size for each category.

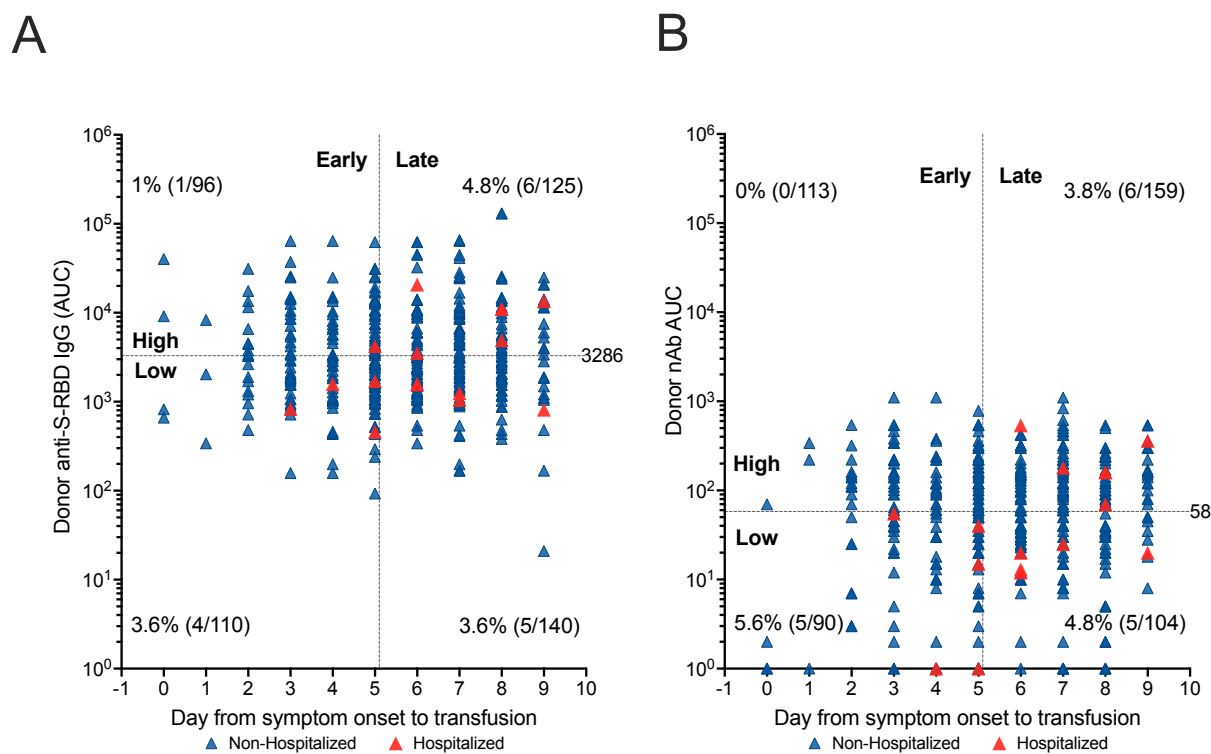

**Fig. 4 Screen pre-transfusion nasal swab viral load determinations** segregated by A) the unvaccinated jointly stratified early/late or high/low groups. B) CCP or control plasma administration in those hospitalized or not hospitalized. Unvaccinated pre-Delta period participants were segregated into C) seronegative and D) seropositive populations by symptom duration in days to transfusion. Numbers above the x-axis represent geometric mean (GM), the number in the group (n), and percentage of PCR-positive samples (%) for each category. \*\*\* p<0.001, \*\* p=0.002 and \* p=0.033 by non-parametric Kruskal-Wallis multiple comparisons test with Dunn's post-hoc corrections. All point estimates are shown with error bars indicating the geometric mean with geometric SD. The dashed lines indicate samples below the limit of detection of 330 viral copies.

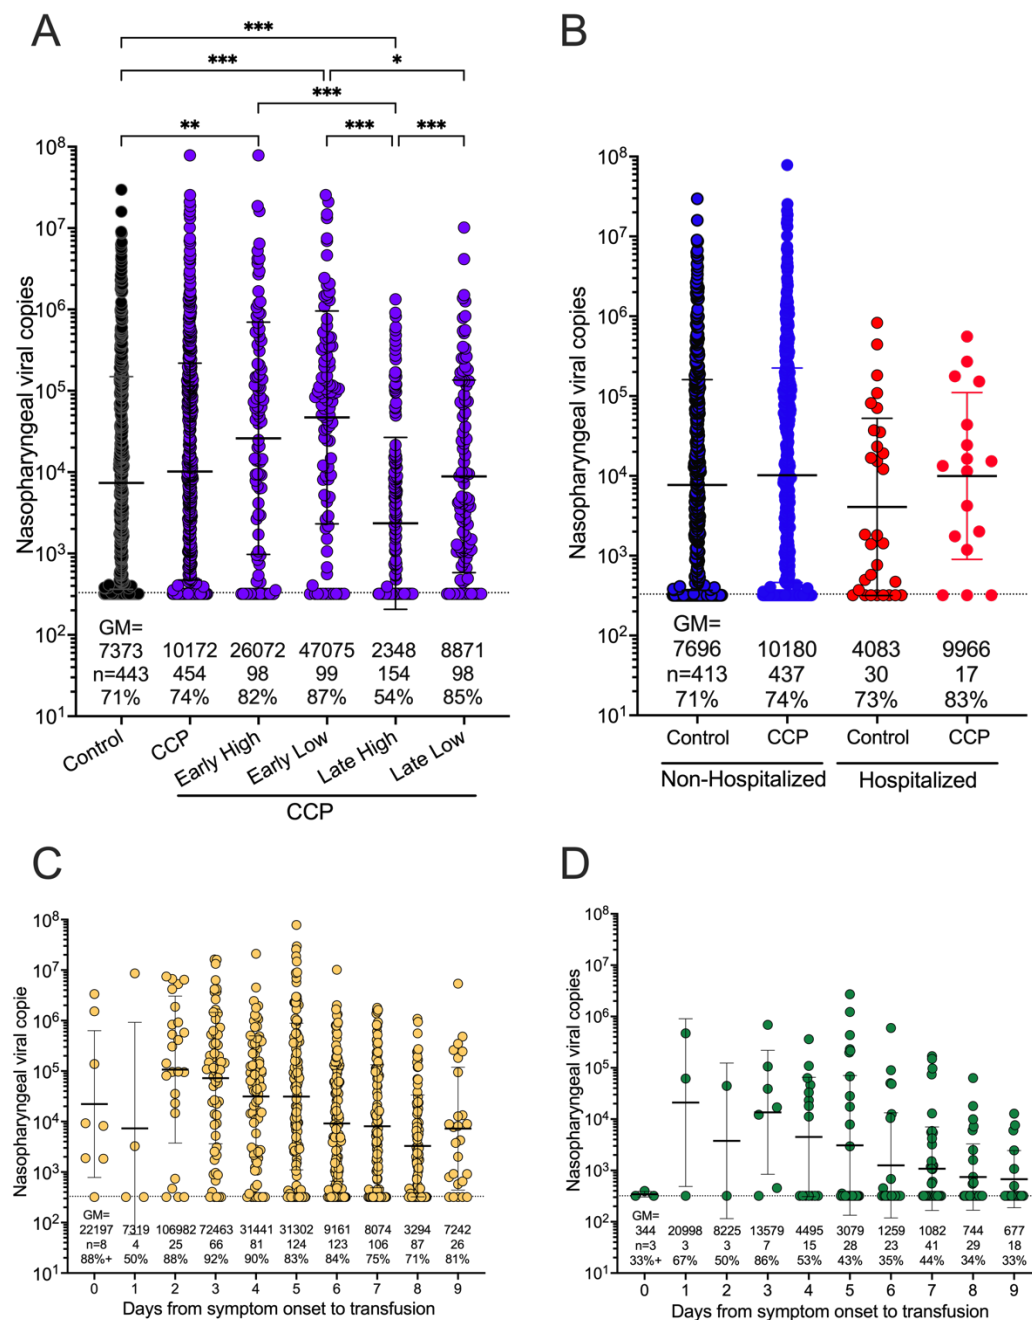

**Fig. 5 Antibody levels over three months past transfusion in those hospitalized or not further segregated by CCP or control plasma.** Log<sub>10</sub>-transformed antibody levels up to 90 days post-transfusion were segregated by treatment and hospitalization status of recipients using a linear mixed effects regression model, adjusted for variant, age, sex, and BMI. CCP recipients have greater AUC levels on D0, but by D14, the hospitalized recipients have greater AUC levels than non-hospitalized. The average days from transfusion to hospitalization was 3.05 days, with all post-transfusion hospitalizations occurring between D0 and D14. The dashed line represents the log-transformed cutoff (1.924) for seropositivity. This diagnostic threshold equals the anti-S-RBD IgG log<sub>10</sub>-transformed value at a 180 titer.

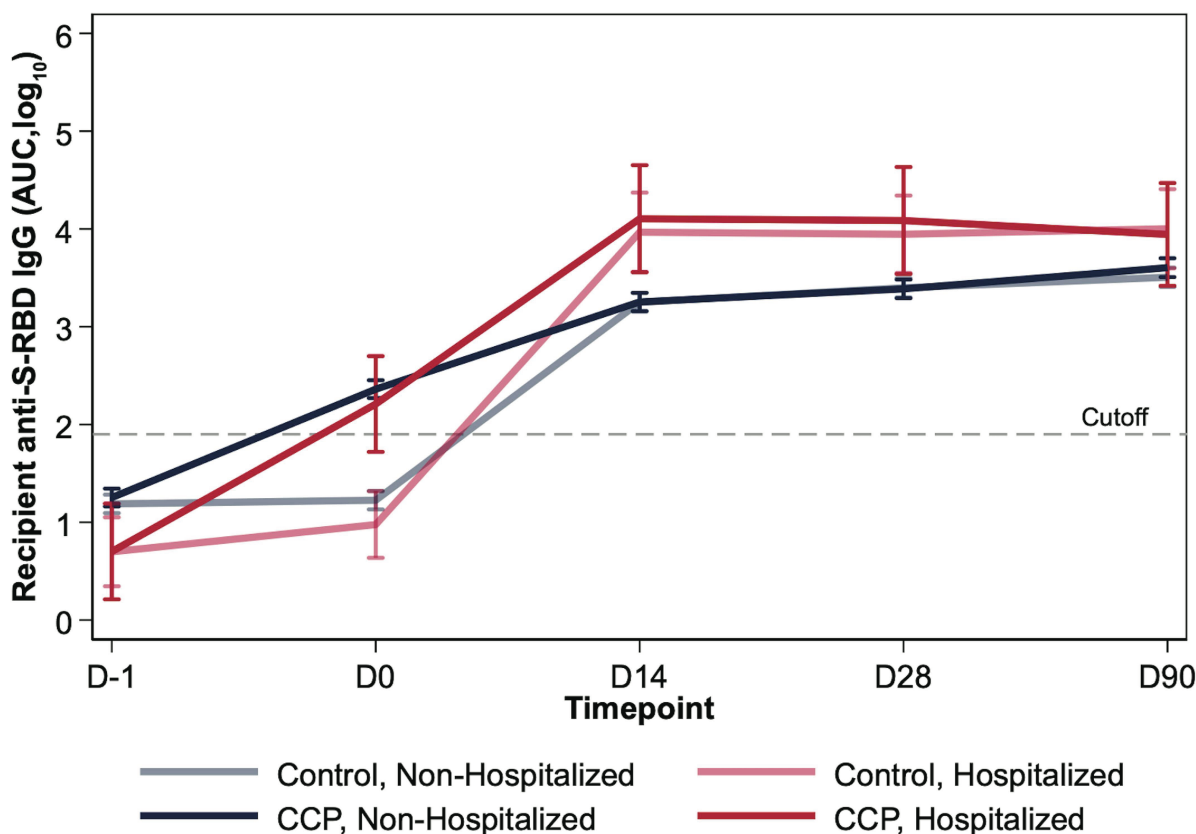

| Group            | Comparison                        | Timepoint | Contrast | P Value |
|------------------|-----------------------------------|-----------|----------|---------|
| CCP              | Hospitalized vs. Non-Hospitalized | D0        | -0.144   | 0.573   |
| Control          | Hospitalized vs. Non-Hospitalized | D0        | -0.243   | 0.180   |
| Hospitalized     | CCP vs. Control                   | D0        | 1.23     | <0.001  |
| Non-Hospitalized | CCP vs. Control                   | D0        | 1.13     | <0.001  |
| CCP              | Hospitalized vs. Non-Hospitalized | D14       | 0.819    | 0.003   |
| Control          | Hospitalized vs. Non-Hospitalized | D14       | 0.686    | 0.001   |
| Hospitalized     | CCP vs. Control                   | D14       | 0.129    | 0.702   |
| Non-Hospitalized | CCP vs. Control                   | D14       | -0.003   | 0.963   |
| CCP              | Hospitalized vs. Non-Hospitalized | D28       | 0.649    | 0.020   |
| Control          | Hospitalized vs. Non-Hospitalized | D28       | 0.576    | 0.005   |
| Hospitalized     | CCP vs. Control                   | D28       | 0.061    | 0.856   |
| Non-Hospitalized | CCP vs. Control                   | D28       | -0.012   | 0.857   |

### Extended Figures

Extended Fig. 1 **Post-transfusion recipient antibody levels stratified by duration from symptom onset to transfusion.** Anti-S-RBD IgG titer levels 30 minutes post-transfusion for unvaccinated CCP recipients are plotted by recipients' days from symptom onset to transfusion, colored by hospitalized (red dots) or non-hospitalized (blue dots). Early ( $\leq 5$  days of symptom onset) or late ( $>5$  days after symptom onset) transfusion is indicated by a dashed line on the x-axis. High ( $>540$  AUC) or low ( $\leq 540$  AUC) levels of antibody are indicated by the dashed line on the y-axis. CCP recipients with early transfusion with high measured anti-S-RBD IgG titer levels shortly after transfusion had the lowest proportion of hospitalization (0%) whereas those with late transfusion and low measured antibody levels had the greatest (5.3%), consistent with the data in AUC units.

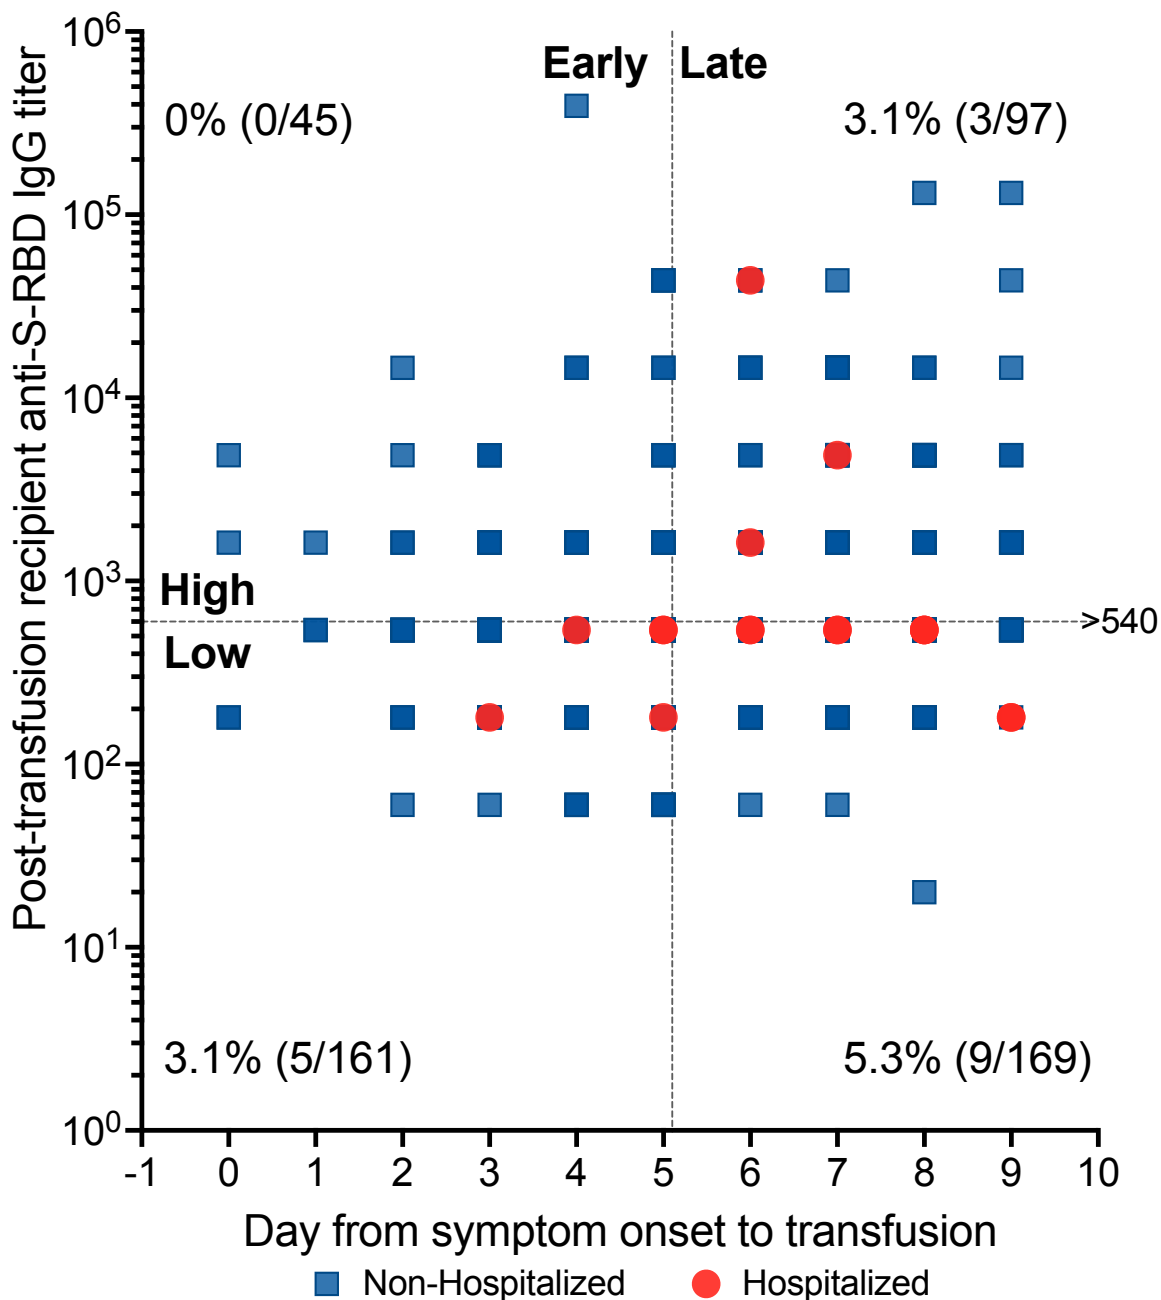

**Extended Fig. 2 Recipients stratified by duration from symptom onset to transfusion matched to donor unit titer antibody levels.** Donor unit antibody levels that correspond with unvaccinated, CCP recipient antibody data segregated by duration from symptom onset to transfusion. A) Early recipients with donor anti-S-RBD IgG titer levels over 4860 were found to correlate with the lowest proportion of hospitalizations (1.1%). B) Early recipients with donor neutralization antibody (nAb) titer levels greater than the median of 80 also had the lowest proportion of hospitalizations (0%). The percentage of recipients hospitalized is indicated in each quadrant of the graph. Numbers in each quadrant represent the proportion of hospitalization and sample size for each category.

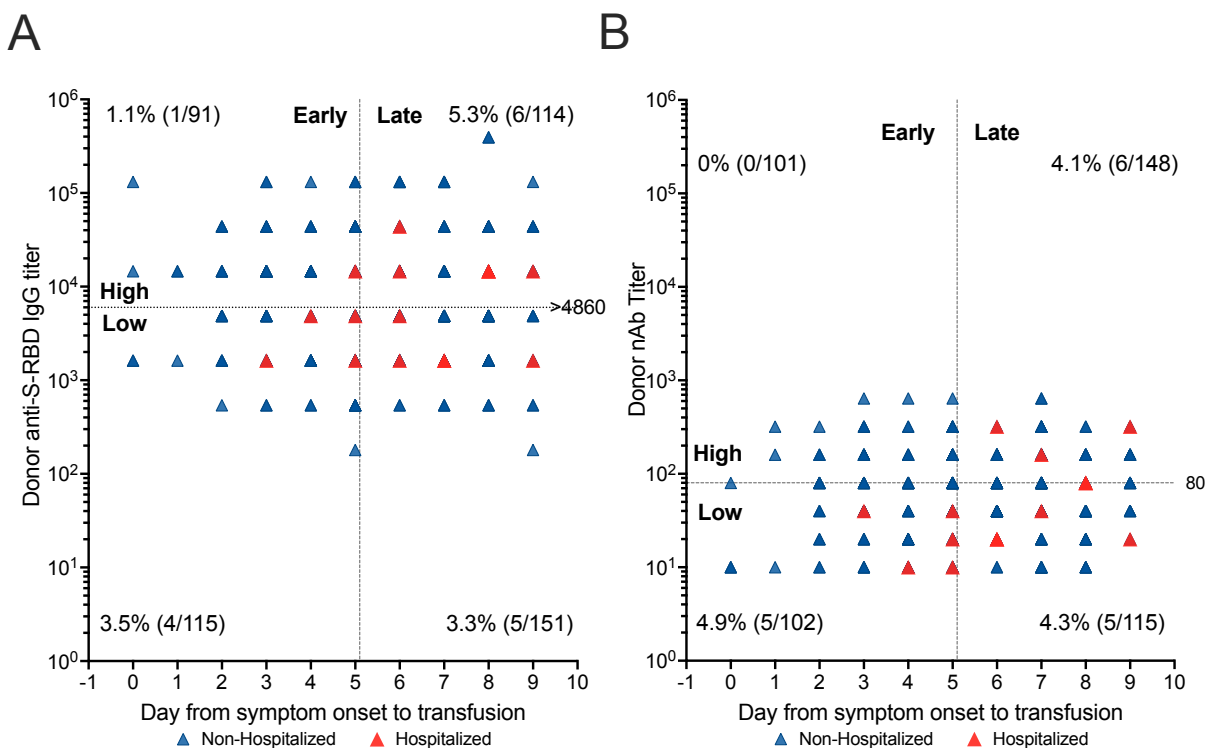

Extended Fig. 3 **Recipients segregated by duration from symptom onset to transfusion matched to donor unit antibody levels measured by EUROIMMUN.** Donor unit antibody levels that correspond with unvaccinated, CCP recipient antibody data segregated by duration from symptom onset to transfusion. A) Early recipients with donor EUROIMMUN over mean of 6 AU were found to correlate with the lowest proportion of hospitalizations (0%). B) Early recipients with EUROIMMUN BAU/mL greater than the geometric mean of 600 also had the lowest proportion of hospitalizations (0%). The percentage of recipients hospitalized is indicated in each quadrant of the graph. Numbers in each quadrant represent the proportion of hospitalization and sample size for each category.

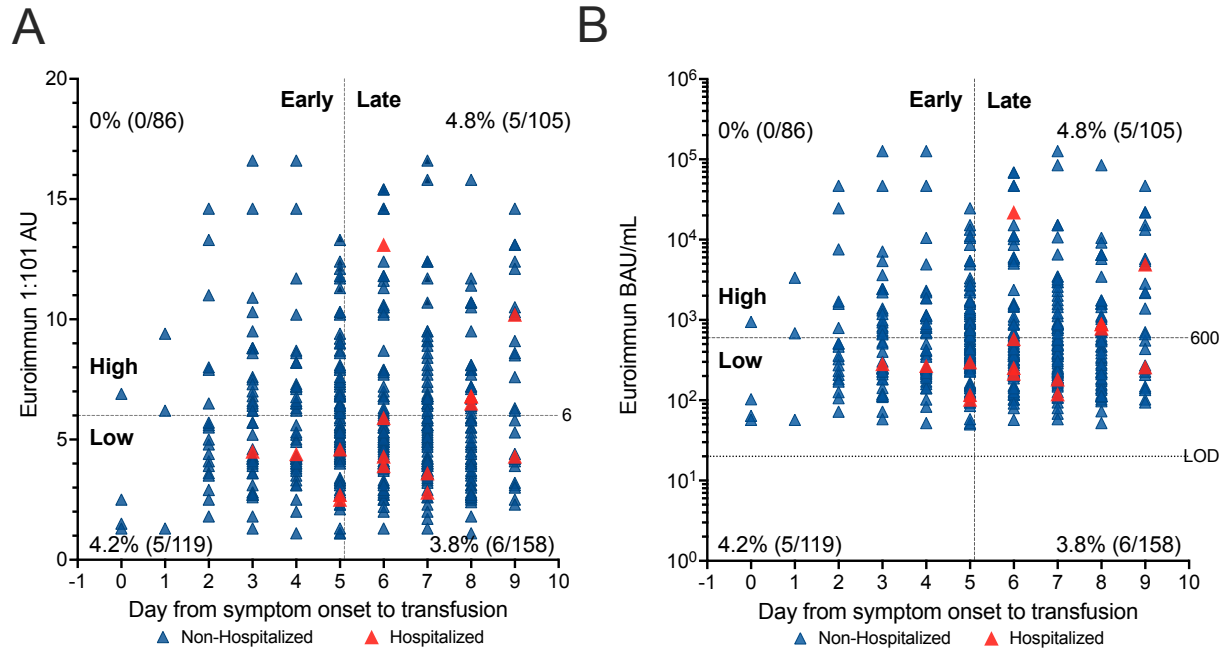

Extended Fig 4 **Antibody levels and viral loads by variant period** A) Unvaccinated and fully vaccinated, but seropositive recipient antibody levels (anti-S-RBD AUC) at screening pre-transfusion as well as fully vaccinated seropositive participants. B) Nasal swab viral load determinations for both vaccinated and unvaccinated segregated by B) CCP or control plasma administration C) serostatus of vaccinated and unvaccinated participants. \*\*\* $p < 0.001$  and \* $p = 0.033$  by non-parametric Kruskal-Wallis multiple comparisons test with Dunn's post-hoc corrections. All point estimates are shown with error bars indicating the geometric mean with geometric SD. Numbers above the x-axis in B and C represent the geometric means (GM), the number in the group (n) and percentage of samples PCR positive (%). The dashed line in A represents the upper portion post-transfusion 150 AUC recipient's threshold. The dashed lines indicate samples below the limit of detection of 330 viral copies.

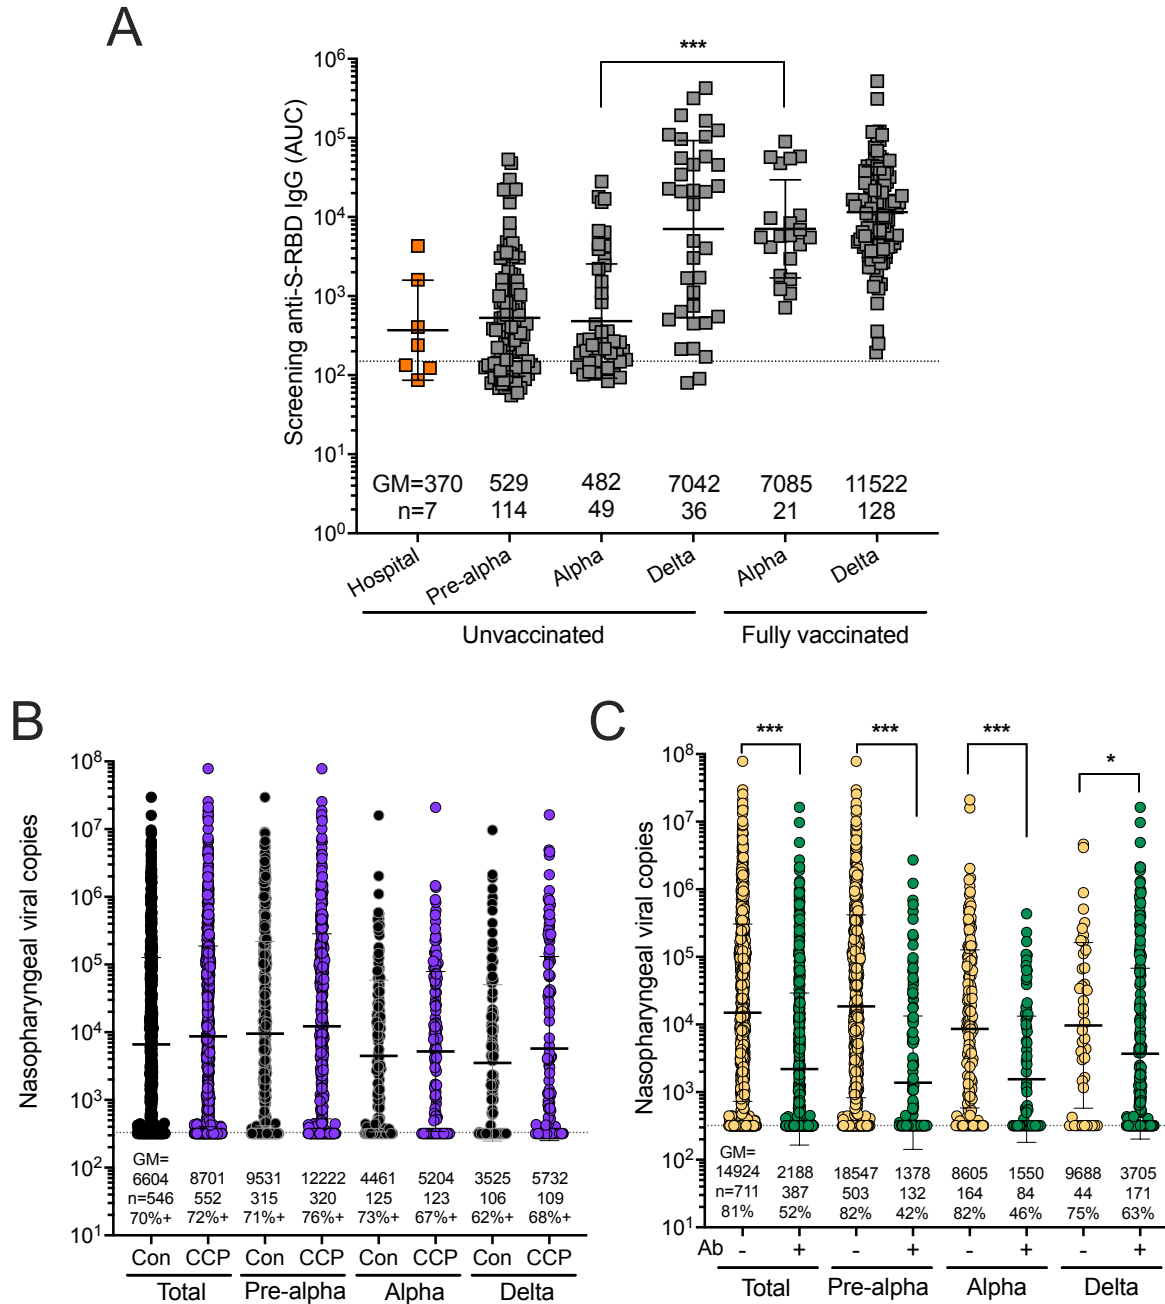



Extended Fig. 5 **Screen viral loads during the Delta period.** During the Delta period there were only 77 (34%) participants unvaccinated to segregate into A) seronegative (n=42) and B) seropositive (n=35) groups by duration from symptom onset to transfusion. C) During the Delta period fully vaccinated participants (n=128) were antibody positive with an additional single recipient fully vaccinated, but seronegative with nasal viral load on day 0 of 320 (not graphed). All point estimates are shown with error bars indicating the geometric mean with geometric SD. Numbers above the x-axis represent geometric means (GM), the number in the group (n), and the percentage of samples PCR positive (%). The dashed lines indicate samples below the limit of detection of 330 viral copies.

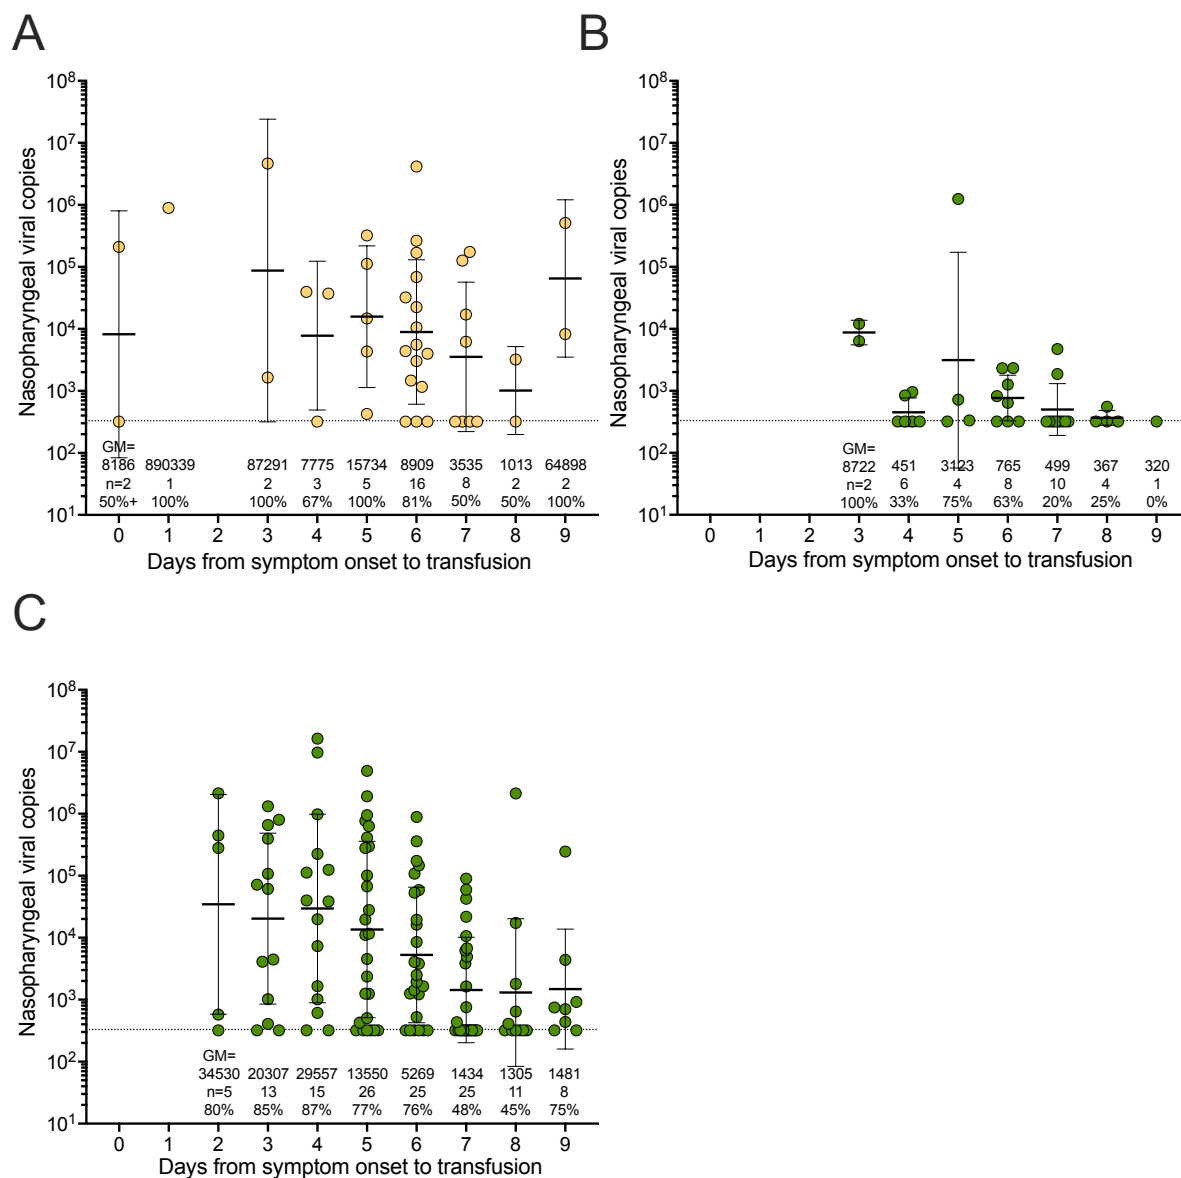

Extended Fig. 6 **Antibody levels three months post-transfusion.** recipients anti-S-RBD AUC antibody levels at Day 90 post-transfusion (excluding the 165 vaccinated during the follow-up visits) separated by A) Jointly stratified unvaccinated early and late treatment with high or low post-transfusion antibody levels B) both CCP and control recipients by SARS-CoV-2 variant period and vaccination status. Clear squares indicate donor, red squares indicate hospitalized recipients, and gray squares indicate both CCP and control non-hospitalized recipients. \*\*\* $p < 0.001$  and \* $p = 0.033$  by non-parametric Kruskal-Wallis multiple comparisons test with Dunn's post-hoc corrections. All point estimates are shown with error bars indicating the geometric mean with geometric SD. Numbers above the x-axis represent each category's geometric mean (GM) and number in the group (n). The dashed line in A, B represents the upper portion post-transfusion 150 AUC recipient's threshold, GM donor 3286 AUC and GM donor 6678 titer.

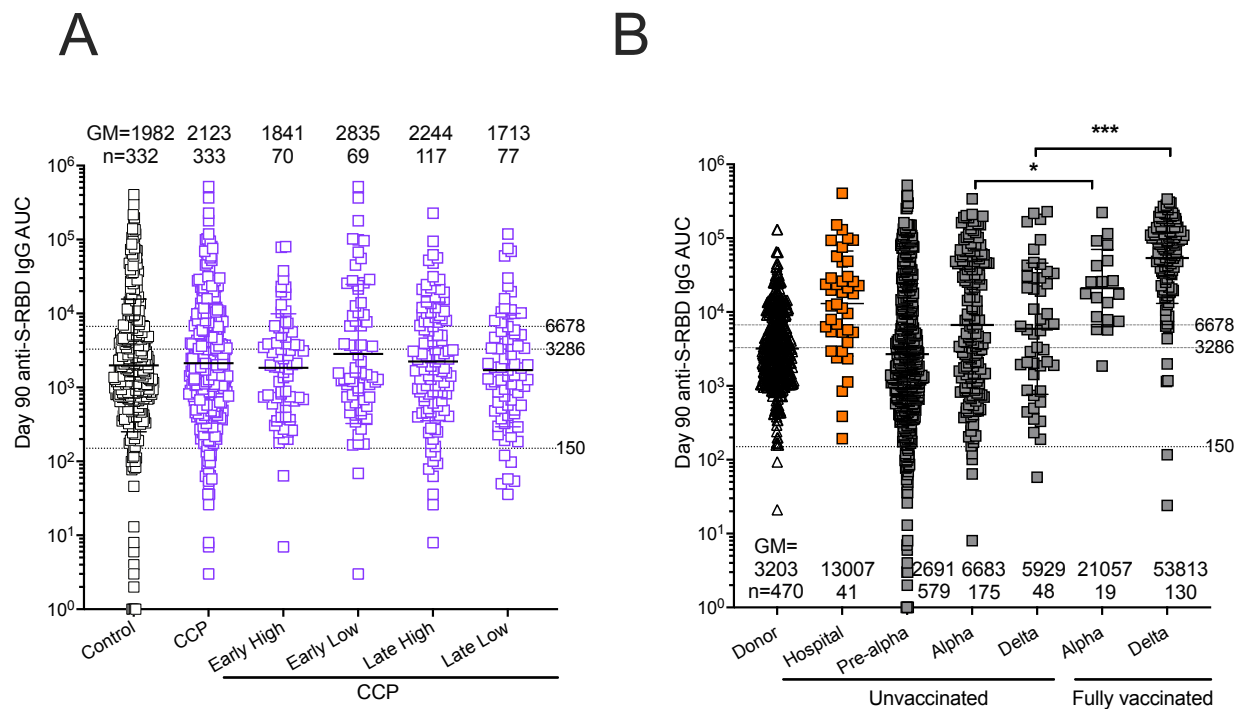

Source: https://medrxiv.org/content/medrxiv/early/2023/04/24/2023.04.13.23288353.full.pdf
